# Supplementary material for: Genomic Clustering of differential DNA methylated regions (epimutations) associated with the epigenetic transgenerational inheritance of disease and phenotypic variation
Source: PubMed Central journal article supplement (PMC4888261; doi:10.1186/s12864-016-2748-5), 2016-06-01
Supplement: 12864_2016_2748_MOESM1_ESM.pdf [file 12864_2016_2748_MOESM1_ESM.pdf]

Supplemental Figure S1

```
#####
#####
# Code for clustering
# Input parameters (1) table containing field Chromosome, cSTART, cSTOP, minP and nProbes
#                   (2) windowLength have the sliding window size in million bases
#                   (3) incrementLength have the number of bases the sliding window should be moved
#                   i.e.
#                   cluster_table <- Clustering(ctable, 2000000, 50000)
# Output
#                   table containing Clusters containing fields Chromosome, cSTART, cSTOP and cluster p-value
#####
#####

SlidingWindowCluster <- function(ctable, windowLength, incrementLength)
{
  ctable <- ctable[c("Chromosome","cSTART","cSTOP","minP","nProbes")]
  ctable <- split(ctable, ctable["Chromosome"])

  cmatrix <- matrix(0, nrow=100000, ncol=6, dimnames=list(c(1:100000),c("Chromosome", "cSTART","cSTOP","Count", "Z-score","P-
value")))
  index <- 0

  # loop through each of the chromosomes
  for(k in 1: length(names(ctable)))
  {
    if(nrow(ctable[[k]])==0)
    {
      # print(paste("no rows on chromosome ", names(ctable[[k]]))
    }else{
      char <- names(ctable)[k]
      # cat("chromosome :", char )

      #reset counterpatient
      count <- 0
      limit <- as.integer (max(ctable[[k]]["cSTOP"])/incrementLength)

      for(i in 1: limit )
      {
        m = (i * incrementLength) + windowLength
        i = i * incrementLength
        count <- 0
        # look at the total sites for chromosome k
        for(j in 1: nrow(ctable[[k]]))
        {
          # if the site falls within the million bases
          if( (ctable[[k]][j,"cSTART"] > i) & (ctable[[k]][j,"cSTOP"] < m))
          {
            # then increase counter
            count = count +1
          }
        }
        # Enter the repeats in that particular sequence
        if(count >= 1)
        {
          # copy the repeat to "seq" if count is more than 2
          seq <- paste("chromosome :", char , "start: ",as.integer(i),
" end: ", as.integer(m), "count: ", as.integer(count) )
          cmatrix[index,"Chromosome"] <- as.character(char)
          cmatrix[index,"cSTART"] <- as.integer(i)
          cmatrix[index,"cSTOP"] <- as.integer(m)
          cmatrix[index,"Count"] <- as.integer(count)
          index=index+1
        }
        count <- 0
      }
    }
  }
  count = 0
}

```

```

}

sliding_window <- cmatrix
sliding_window <- sliding_window[1:(head(which(cmatrix[,"Chromosome"]==0),1)-1),]
sliding_window[,"cSTART"] <- as.numeric(as.character(sliding_window[,"cSTART"]))
sliding_window[,"cSTOP"] <- as.numeric(as.character(sliding_window[,"cSTOP"]))
sliding_window[,"Count"] <- as.numeric(as.character(sliding_window[,"Count"]))

# Z-value formula
X <- as.numeric(sliding_window[,"Count"])
meanM <- apply(as.matrix(X, ncol=1), 2, mean)
sdM <- apply(as.matrix(X, ncol=1), 2, sd)

# From the Z-score calculate P-value
Z <- apply( as.matrix(X,ncol=1), 2, function(x) (x - meanM) / sdM)
P_value <- 2 * pnorm(-abs(Z))

# Insert Z-score and P-value into sliding_window table
sliding_window[,"Z-score"] <- Z
sliding_window[,"P-value"] <- P_value
sliding_window <- sliding_window[order(sliding_window[,"Chromosome"],sliding_window[,"cSTART"]),]
sliding_window <- sliding_window[which(as.numeric(as.character(sliding_window[,"P-value"])) < 0.05),]

clusters <- data.frame(Chromosome=as.character(sliding_window[,"Chromosome"]),
                      cSTART=as.integer(as.character(sliding_window[,"cSTART"])),
                      cSTOP=as.integer(as.character(sliding_window[,"cSTOP"])),
                      Count=as.integer(as.character(sliding_window[,"Count"])),
                      Z.score=as.integer(as.character(sliding_window[,"Z-score"])),
                      P.value=as.numeric(sliding_window[,"P-value"]))

clusters <- clusters[order(clusters[,"Chromosome"],clusters[,"cSTART"]),]
clusters <- split(clusters,clusters[,"Chromosome"])
#names(clusters)

Seq <- cmatrix <- c()
k <- 0
cluster_p_value <- 0.05
cluster_p_value_first <- 0.05
cluster_p_value_next <- 0.05

for(i in 1: length(names(clusters)))
{
k <- 1
  name <- names(clusters[[i]])

  limit <- nrow(clusters[[i]])-1

  if(limit==0)
  {
cluster_start <- as.numeric(clusters[[i]][,"cSTART"])
cluster_end <- as.numeric(clusters[[i]][,"cSTOP"])
cluster_p_value <- as.numeric(clusters[[i]][,"P.value"])
Seq <- data.frame(Chromosome = as.character(name),
cSTART = as.numeric(cluster_start),
cSTOP=as.numeric(cluster_end),
minP = as.numeric(cluster_p_value))
cmatrix <- rbind(cmatrix,Seq)
cluster_p_value <- 0
}

  else
  {

# go through each row of the chromosome
for(j in 1: limit)
{
# initialize with the first row by default
if(k==1)

```

```

    {
      m <- clusters[[i]][j,]
      cluster_start <- as.numeric(clusters[[i]][j,"cSTART"])
      cluster_p_value <- as.numeric(clusters[[i]][j,"P.value"])
      k <- 0
    }

  start1 <- clusters[[i]][j,"cSTOP"]
  more <- j+1
  start2 <- clusters[[i]][more,2]
  if( (start2 - start1) > 1000000)
  {
    cluster_end <- as.numeric(clusters[[i]][j,"cSTOP"])

    cluster_p_value_next <- as.numeric(clusters[[i]][j,"P.value"])

    if(as.numeric(cluster_p_value_next) < as.numeric(cluster_p_value_first))
    {
      cluster_p_value <- as.numeric(cluster_p_value_next)
    }
    else
    {
      cluster_p_value <- as.numeric(cluster_p_value_first)
    }

    Seq <- data.frame(Chromosome = as.character(name),
      cSTART = as.numeric(cluster_start),
      cSTOP=as.numeric(cluster_end),
      minP = as.numeric(cluster_p_value))
    cmatrix <- rbind(cmatrix,Seq)
    cluster_start <- as.numeric(clusters[[i]][more,"cSTART"])
  }

  # compare the temp (cluster_p_value) with each (cluster_p_value_next)
  cluster_p_value_next <- as.numeric(clusters[[i]][j,"P.value"])

  # save the lowest p-value for the cluster
  if(as.numeric(cluster_p_value_next) < as.numeric(cluster_p_value))
  {
    cluster_p_value <- as.numeric(cluster_p_value_next)
  }
  else
  {
    cluster_p_value <- as.numeric(cluster_p_value)
  }

  end1 <- clusters[[i]][j,"cSTOP"]
  end2 <- clusters[[i]][j+1,"cSTART"]
  if( (end2 -end1) < 1000000)
  {
    if(j==limit)
    {
      cluster_end <- as.numeric(clusters[[i]][j,"cSTOP"])
      Seq <- data.frame(Chromosome = as.character(name),
        cSTART = as.numeric(cluster_start),
        cSTOP=as.numeric(cluster_end),
        minP = as.numeric(cluster_p_value))
      cmatrix <- rbind(cmatrix,Seq)
    }
  }
}
cluster_p_value <- 0
}
}

return (cmatrix)
}

```
