# Supplementary material for: Genomic Clustering of differential DNA methylated regions (epimutations) associated with the epigenetic transgenerational inheritance of disease and phenotypic variation
Source: PubMed Central journal article supplement (PMC4888261; doi:10.1186/s12864-016-2748-5), 2016-06-01
Supplement: 12864_2016_2748_MOESM2_ESM.pdf [file 12864_2016_2748_MOESM2_ESM.pdf]

**Supplemental Table S1 Male Tissue Gene Cluster**

| Cluster    | Gene         | Gene       | Tissue     |                     |          |          |        |
|------------|--------------|------------|------------|---------------------|----------|----------|--------|
| Chromosome | ClusterStart | ClusterEnd | Gene Name  | Gene Classification | cSTART   | cSTOP    | Type   |
| chr1       | 78400000     | 86500000   | Ltv1       | Development         | 7956276  | 7968981  | M.SV   |
| chr1       | 78400000     | 86500000   | Qpctl      | Metabolism          | 78500461 | 78508517 | M.Liv  |
| chr1       | 78400000     | 86500000   | Snrpd2     | Translation         | 78509142 | 78511991 | M.Tst  |
| chr1       | 78400000     | 86500000   | Erc1       | Epigenetics         | 78709565 | 78722422 | M.Prst |
| chr1       | 78400000     | 86500000   | LOC686781  | NA                  | 78733982 | 78896293 | M.Prst |
| chr1       | 78400000     | 86500000   | Bloc1s3    | Metabolism          | 78860378 | 78860966 | M.Kdn  |
| chr1       | 78400000     | 86500000   | Trappc6a   | Metabolism          | 78862235 | 78869042 | M.Kdn  |
| chr1       | 78400000     | 86500000   | Clptm1     | Metabolism          | 78938921 | 78970671 | M.Prst |
| chr1       | 78400000     | 86500000   | Pvr12      | Receptors           | 79021827 | 79059686 | M.Prst |
| chr1       | 78400000     | 86500000   | Ceacam6    | NA                  | 80110384 | 80129016 | M.Kdn  |
| chr1       | 78400000     | 86500000   | Znf574     | NA                  | 80390353 | 80395599 | M.Tst  |
| chr1       | 78400000     | 86500000   | Gsk3a      | Signaling           | 80505517 | 80514138 | M.Prst |
| chr1       | 78400000     | 86500000   | ---        | NA                  | 80505564 | 80505988 | M.Prst |
| chr1       | 78400000     | 86500000   | Pafah1b3   | Metabolism          | 80570160 | 80572686 | M.Kdn  |
| chr1       | 78400000     | 86500000   | Lipe       | Metabolism          | 80663791 | 80682480 | M.SV   |
| chr1       | 78400000     | 86500000   | Atp5sl     | Metabolism          | 80827838 | 80833767 | M.SV   |
| chr1       | 78400000     | 86500000   | Bckdha     | Metabolism          | 80837906 | 80866672 | M.Tst  |
| chr1       | 78400000     | 86500000   | Axl        | Receptor            | 80964751 | 80994323 | M.Liv  |
| chr1       | 78400000     | 86500000   | Sdccag1    | NA                  | 82120277 | 82122428 | M.Kdn  |
| chr1       | 78400000     | 86500000   | Blvrb      | Metabolism          | 82529086 | 82546598 | M.SV   |
| chr1       | 78400000     | 86500000   | Pld3       | Metabolism          | 82612829 | 82627294 | M.Prst |
| chr1       | 78400000     | 86500000   | Psmc4      | Proteolysis         | 83151146 | 83159470 | M.Kdn  |
| chr1       | 78400000     | 86500000   | Eid2       | NA                  | 83349864 | 83350580 | M.Kdn  |
| chr1       | 78400000     | 86500000   | LOC687295  | Metabolism          | 83398721 | 83400789 | M.Tst  |
| chr1       | 78400000     | 86500000   | Zfp36      | Transcription       | 83486647 | 83489123 | M.SV   |
| chr1       | 78400000     | 86500000   | Zfp36      | Transcription       | 83486647 | 83489123 | M.Prst |
| chr1       | 78400000     | 86500000   | Zfp36      | Transcription       | 83486647 | 83489123 | M.Kdn  |
| chr1       | 78400000     | 86500000   | Gmfg       | Signaling           | 83546798 | 83557015 | M.Prst |
| chr1       | 78400000     | 86500000   | RGD1303117 | NA                  | 84284332 | 84289134 | M.Prst |
| chr1       | 78400000     | 86500000   | Yif1b      | Development         | 84373710 | 84383874 | M.Prst |
| chr1       | 78400000     | 86500000   | Sipa1l3    | Signaling           | 84456418 | 84509587 | M.Prst |
| chr1       | 78400000     | 86500000   | Sipa1l3    | Signaling           | 84522451 | 84522608 | M.Prst |
| chr1       | 78400000     | 86500000   | Sipa1l3    | Signaling           | 84526515 | 84526689 | M.Prst |
| chr1       | 78400000     | 86500000   | Sipa1l3    | Signaling           | 84536782 | 84536912 | M.Prst |
| chr1       | 78400000     | 86500000   | Sipa1l3    | Signaling           | 84538108 | 84540559 | M.Prst |
| chr1       | 78400000     | 86500000   | RGD1562079 | Miscellaneous       | 85268360 | 85268716 | M.Kdn  |
| chr1       | 78400000     | 86500000   | Tyrobp     | Receptor            | 85365371 | 85369227 | M.Prst |
| chr1       | 78400000     | 86500000   | Tyrobp     | Receptor            | 85365371 | 85369227 | M.Kdn  |
| chr1       | 78400000     | 86500000   | Aplp1      | Transcription       | 85390513 | 85399802 | M.Prst |
| chr1       | 78400000     | 86500000   | Polr2i     | Transcription       | 85489091 | 85490390 | M.Kdn  |
| chr1       | 78400000     | 86500000   | Tmem147    | Receptor            | 85771683 | 85773503 | M.Kdn  |
| chr1       | 78400000     | 86500000   | Gramd1a    | Unknown             | 86175390 | 86196895 | M.SV   |
| chr1       | 93350000     | 97450000   | RGD1564800 | NA                  | 93542062 | 93542430 | M.Prst |
| chr1       | 93350000     | 97450000   | Siglec5    | Receptor            | 93734935 | 93742543 | M.Liv  |
| chr1       | 93350000     | 97450000   | Atpbd3     | NA                  | 94085739 | 94088431 | M.Prst |
| chr1       | 93350000     | 97450000   | Klk1l      | NA                  | 94624828 | 94628822 | M.Kdn  |
| chr1       | 93350000     | 97450000   | MGC93975   | NA                  | 94967722 | 94974041 | M.Prst |
| chr1       | 93350000     | 97450000   | MGC93975   | NA                  | 94967722 | 94974041 | M.Kdn  |
| chr1       | 93350000     | 97450000   | Napsa      | Protease            | 95050769 | 95062774 | M.Liv  |
| chr1       | 93350000     | 97450000   | Myh14      | Cytoskeleton        | 95081948 | 95146455 | M.Prst |
| chr1       | 93350000     | 97450000   | Pnkp       | Signaling           | 95330455 | 95335468 | M.Kdn  |
| chr1       | 93350000     | 97450000   | Ptov1      | Transcription       | 95335896 | 95342760 | M.Prst |

|      |           |           |                    |               |           |           |        |
|------|-----------|-----------|--------------------|---------------|-----------|-----------|--------|
| chr1 | 93350000  | 97450000  | Med25              | Transcription | 95350225  | 95364484  | M.Prst |
| chr1 | 93350000  | 97450000  | Irf3               | Transcription | 95470284  | 95525050  | M.Kdn  |
| chr1 | 93350000  | 97450000  | Rras               | Signaling     | 95490697  | 95495452  | M.Kdn  |
| chr1 | 93350000  | 97450000  | Aldh16a1           | Metabolism    | 95553561  | 95630798  | M.Kdn  |
| chr1 | 93350000  | 97450000  | ENSRNOT00000053402 | NA            | 95601754  | 95601835  | M.Tst  |
| chr1 | 93350000  | 97450000  | ENSRNOT00000052978 | NA            | 95602277  | 95602357  | M.Tst  |
| chr1 | 93350000  | 97450000  | Cd37               | Signaling     | 95709954  | 95715614  | M.Prst |
| chr1 | 93350000  | 97450000  | Trpm4              | Transport     | 95773700  | 95803496  | M.Prst |
| chr1 | 93350000  | 97450000  | Snrp70             | NA            | 95847853  | 95868392  | M.Kdn  |
| chr1 | 93350000  | 97450000  | Sphk2              | Signaling     | 96178615  | 96184993  | M.Prst |
| chr1 | 93350000  | 97450000  | Nomo1              | Protease      | 96528665  | 96579464  | M.Prst |
| chr1 | 93350000  | 97450000  | LOC494539          | NA            | 97324367  | 97324774  | M.Kdn  |
| chr1 | 109400000 | 113350000 | ENSRNOT00000053882 | NA            | 111288045 | 111288137 | M.Tst  |
| chr1 | 109400000 | 113350000 | ENSRNOT00000053882 | NA            | 111288045 | 111288137 | M.Prst |
| chr1 | 109400000 | 113350000 | ENSRNOT00000054014 | NA            | 111338314 | 111338406 | M.Kdn  |
| chr1 | 109400000 | 113350000 | ENSRNOT00000053184 | NA            | 111346992 | 111347084 | M.Tst  |
| chr1 | 109400000 | 113350000 | ENSRNOT00000052564 | NA            | 111349177 | 111349269 | M.Tst  |
| chr1 | 109400000 | 113350000 | ENSRNOT00000052564 | NA            | 111349177 | 111349269 | M.Prst |
| chr1 | 109400000 | 113350000 | ENSRNOT00000053117 | NA            | 111353374 | 111353466 | M.Tst  |
| chr1 | 109400000 | 113350000 | ENSRNOT00000052661 | NA            | 111358225 | 111358317 | M.Tst  |
| chr1 | 109400000 | 113350000 | ENSRNOT00000053882 | NA            | 111360802 | 111360894 | M.Tst  |
| chr1 | 109400000 | 113350000 | ENSRNOT00000053882 | NA            | 111360802 | 111360894 | M.Prst |
| chr1 | 109400000 | 113350000 | ENSRNOT00000052661 | NA            | 111363398 | 111363490 | M.Tst  |
| chr1 | 109400000 | 113350000 | ENSRNOT00000053936 | NA            | 111369407 | 111369499 | M.Tst  |
| chr1 | 109400000 | 113350000 | ENSRNOT00000053882 | NA            | 111371982 | 111372074 | M.Tst  |
| chr1 | 109400000 | 113350000 | ENSRNOT00000053882 | NA            | 111371982 | 111372074 | M.Prst |
| chr1 | 109400000 | 113350000 | ENSRNOT00000053882 | NA            | 111374556 | 111374648 | M.Tst  |
| chr1 | 109400000 | 113350000 | ENSRNOT00000053882 | NA            | 111374556 | 111374648 | M.Prst |
| chr1 | 109400000 | 113350000 | ENSRNOT00000053019 | NA            | 111379836 | 111379928 | M.Tst  |
| chr1 | 109400000 | 113350000 | ENSRNOT00000053882 | NA            | 111386349 | 111386441 | M.Tst  |
| chr1 | 109400000 | 113350000 | ENSRNOT00000053882 | NA            | 111386349 | 111386441 | M.Prst |
| chr1 | 109400000 | 113350000 | ENSRNOT00000053882 | NA            | 111388918 | 111389010 | M.Tst  |
| chr1 | 109400000 | 113350000 | ENSRNOT00000053882 | NA            | 111388918 | 111389010 | M.Prst |
| chr1 | 109400000 | 113350000 | ENSRNOT00000053882 | NA            | 111391497 | 111391589 | M.Tst  |
| chr1 | 109400000 | 113350000 | ENSRNOT00000053882 | NA            | 111391497 | 111391589 | M.Prst |
| chr1 | 109400000 | 113350000 | ENSRNOT00000053974 | NA            | 111396632 | 111396724 | M.Tst  |
| chr1 | 109400000 | 113350000 | ENSRNOT00000053882 | NA            | 111399841 | 111399933 | M.Tst  |
| chr1 | 109400000 | 113350000 | ENSRNOT00000053882 | NA            | 111399841 | 111399933 | M.Prst |
| chr1 | 109400000 | 113350000 | ENSRNOT00000053934 | NA            | 111450980 | 111451072 | M.Tst  |
| chr1 | 109400000 | 113350000 | ENSRNOT00000053882 | NA            | 111456841 | 111456933 | M.Tst  |
| chr1 | 109400000 | 113350000 | ENSRNOT00000053882 | NA            | 111456841 | 111456933 | M.Prst |
| chr1 | 109400000 | 113350000 | ENSRNOT00000052507 | NA            | 111459481 | 111459573 | M.Tst  |
| chr1 | 109400000 | 113350000 | ENSRNOT00000052993 | NA            | 111464457 | 111464549 | M.Kdn  |
| chr1 | 109400000 | 113350000 | ENSRNOT00000053882 | NA            | 111467045 | 111467137 | M.Tst  |
| chr1 | 109400000 | 113350000 | ENSRNOT00000053882 | NA            | 111467045 | 111467137 | M.Prst |
| chr1 | 109400000 | 113350000 | ENSRNOT00000053081 | NA            | 111469638 | 111469730 | M.Prst |
| chr1 | 109400000 | 113350000 | ENSRNOT00000053855 | NA            | 111472244 | 111472335 | M.Tst  |
| chr1 | 184850000 | 187650000 | Xpo6               | Transport     | 185180272 | 185269588 | M.Tst  |
| chr1 | 184850000 | 187650000 | Rabep2             | Signaling     | 185536967 | 185553191 | M.Prst |
| chr1 | 184850000 | 187650000 | Eif3c              | Translation   | 185691630 | 185709597 | M.SV   |
| chr1 | 184850000 | 187650000 | Coro1a             | Cytoskeleton  | 185852741 | 185857715 | M.Kdn  |
| chr1 | 184850000 | 187650000 | Ccdc95             | NA            | 186030833 | 186041424 | M.SV   |
| chr1 | 184850000 | 187650000 | Cdipt              | Metabolism    | 186153278 | 186157417 | M.Tst  |
| chr1 | 184850000 | 187650000 | Tbc1d10b           | Signaling     | 186457439 | 186468587 | M.Prst |
| chr1 | 184850000 | 187650000 | Xtp3tpa            | NA            | 186519952 | 186523348 | M.Tst  |
| chr1 | 184850000 | 187650000 | Prr14              | Metabolism    | 186728878 | 186776101 | M.Tst  |

|      |           |           |                    |                    |           |           |        |
|------|-----------|-----------|--------------------|--------------------|-----------|-----------|--------|
| chr1 | 184850000 | 187650000 | ENSRNOT00000053325 | NA                 | 186812653 | 186812786 | M.Tst  |
| chr1 | 184850000 | 187650000 | Rnf40              | Proteolysis        | 186876103 | 186890731 | M.Prst |
| chr1 | 184850000 | 187650000 | Bcl7c              | Transcription      | 186993655 | 186997355 | M.Kdn  |
| chr1 | 200800000 | 203450000 | Rnh1               | Translation        | 201358638 | 201371015 | M.Kdn  |
| chr1 | 200800000 | 203450000 | Irf7               | Transcription      | 201456689 | 201459756 | M.Prst |
| chr1 | 200800000 | 203450000 | Tmem80             | Miscellaneous      | 201524983 | 201533594 | M.Hrt  |
| chr1 | 200800000 | 203450000 | Tspan4             | Cytoskeleton       | 201661383 | 201681078 | M.Kdn  |
| chr1 | 200800000 | 203450000 | Tspan4             | Cytoskeleton       | 201661383 | 201681078 | M.Hrt  |
| chr1 | 200800000 | 203450000 | Tollip             | Immune             | 201997982 | 202029669 | M.Prst |
| chr1 | 200800000 | 203450000 | Lsp1               | Cytoskeleton       | 202707305 | 202741026 | M.Prst |
| chr1 | 200800000 | 203450000 | Lsp1               | Cytoskeleton       | 202707305 | 202741026 | M.Liv  |
| chr1 | 200800000 | 203450000 | Lsp1               | Cytoskeleton       | 202707305 | 202741026 | M.Kdn  |
| chr1 | 200800000 | 203450000 | Mrpl23             | Translation        | 202780065 | 202787834 | M.Kdn  |
| chr1 | 200800000 | 203450000 | Tssc4              | Transcription      | 203344569 | 203346200 | M.Prst |
| chr1 | 204750000 | 215150000 | Med23              | Transcription      | 20999942  | 21060567  | M.Tst  |
| chr1 | 204750000 | 215150000 | Enpp1              | Signaling          | 21223674  | 21287411  | M.Tst  |
| chr1 | 204750000 | 215150000 | Ctgf               | Growth Factor      | 21327099  | 21330215  | M.Kdn  |
| chr1 | 204750000 | 215150000 | Ppfi1              | Signaling          | 204908188 | 204984408 | M.Tst  |
| chr1 | 204750000 | 215150000 | Ppfi1              | Signaling          | 204951084 | 204951332 | M.Prst |
| chr1 | 204750000 | 215150000 | Ppfi1              | Signaling          | 204951084 | 204951332 | M.Kdn  |
| chr1 | 204750000 | 215150000 | Ccnd1              | Cell cycle         | 205357283 | 205366810 | M.Prst |
| chr1 | 204750000 | 215150000 | Cpt1a              | Metabolism         | 205852746 | 205913024 | M.Prst |
| chr1 | 204750000 | 215150000 | Chka               | Signaling          | 206368963 | 206418527 | M.Liv  |
| chr1 | 204750000 | 215150000 | Ndufs8             | Metabolism         | 206433668 | 206436543 | M.Tst  |
| chr1 | 204750000 | 215150000 | Unc93b1            | Immune             | 206460327 | 206471241 | M.Kdn  |
| chr1 | 204750000 | 215150000 | Aip                | Protein binding    | 206697248 | 206704462 | M.Tst  |
| chr1 | 204750000 | 215150000 | Tmem134            | Miscellaneous      | 206708922 | 206714409 | M.Kdn  |
| chr1 | 204750000 | 215150000 | Rpl35a             | Translation        | 206730060 | 206730392 | M.Tst  |
| chr1 | 204750000 | 215150000 | LOC100361529       | NA                 | 206778858 | 206785229 | M.Tst  |
| chr1 | 204750000 | 215150000 | Rce1               | Protease           | 207213688 | 207216827 | M.Prst |
| chr1 | 204750000 | 215150000 | Rbm14              | Translation        | 207411506 | 207421695 | M.Tst  |
| chr1 | 204750000 | 215150000 | Zdhhc24            | Transcription      | 207493087 | 207499194 | M.Prst |
| chr1 | 204750000 | 215150000 | Slc29a2            | Transport          | 207643719 | 207650360 | M.Tst  |
| chr1 | 204750000 | 215150000 | B3gnt1             | Metabolism         | 207659001 | 207661260 | M.Kdn  |
| chr1 | 204750000 | 215150000 | Yif1               | NA                 | 207711336 | 207715338 | M.Kdn  |
| chr1 | 204750000 | 215150000 | Eif1ad             | Translation        | 208010510 | 208015810 | M.Kdn  |
| chr1 | 204750000 | 215150000 | RGD1562657         | NA                 | 208214415 | 208217148 | M.Prst |
| chr1 | 204750000 | 215150000 | Rela               | Transcription      | 208262669 | 208273148 | M.SV   |
| chr1 | 204750000 | 215150000 | Pcnx13             | Development        | 208288930 | 208311240 | M.Tst  |
| chr1 | 204750000 | 215150000 | Mtvr2              | NA                 | 208355217 | 208356772 | M.Kdn  |
| chr1 | 204750000 | 215150000 | Ltbp3              | Signaling          | 208366405 | 208385177 | M.Hrt  |
| chr1 | 204750000 | 215150000 | BC090353           | NA                 | 208428092 | 208428255 | M.Prst |
| chr1 | 204750000 | 215150000 | BC090353           | NA                 | 208428092 | 208428255 | M.Kdn  |
| chr1 | 204750000 | 215150000 | Frmf8              | Signaling          | 208489337 | 208509947 | M.Kdn  |
| chr1 | 204750000 | 215150000 | Dpf2               | Transcription      | 208530922 | 208544954 | M.Tst  |
| chr1 | 204750000 | 215150000 | Syvn1              | Protease           | 208684467 | 208690975 | M.Prst |
| chr1 | 204750000 | 215150000 | Cdc42bpg           | Signaling          | 209084212 | 209111593 | M.Prst |
| chr1 | 204750000 | 215150000 | Sf1                | Translation        | 209146188 | 209159459 | M.Tst  |
| chr1 | 204750000 | 215150000 | RGD1566262         | NA                 | 209405376 | 209405903 | M.Prst |
| chr1 | 204750000 | 215150000 | RGD1566262         | NA                 | 209405376 | 209405903 | M.Kdn  |
| chr1 | 204750000 | 215150000 | Esrra              | Receptors          | 209587682 | 209597677 | M.Liv  |
| chr1 | 204750000 | 215150000 | Trpt1              | Translation        | 209669953 | 209672820 | M.Prst |
| chr1 | 204750000 | 215150000 | Otub1              | Protease           | 209871581 | 209886083 | M.Tst  |
| chr1 | 204750000 | 215150000 | Otub1              | Protease           | 209871581 | 209886083 | M.Kdn  |
| chr1 | 204750000 | 215150000 | Cox8a              | Electron transport | 209886132 | 209888462 | M.Kdn  |
| chr1 | 204750000 | 215150000 | Mark2              | Signaling          | 209958902 | 210022099 | M.Prst |

|      |           |           |                    |                 |           |           |        |
|------|-----------|-----------|--------------------|-----------------|-----------|-----------|--------|
| chr1 | 204750000 | 215150000 | RGD1560108         | NA              | 210107906 | 210108290 | M.SV   |
| chr1 | 204750000 | 215150000 | Rtn3               | Transport       | 210109534 | 210166035 | M.Prst |
| chr1 | 204750000 | 215150000 | Slc3a2             | Metabolism      | 211375889 | 211390313 | M.Prst |
| chr1 | 204750000 | 215150000 | ENSRNOT00000054147 | NA              | 211392417 | 211392480 | M.Tst  |
| chr1 | 204750000 | 215150000 | ENSRNOT00000052494 | NA              | 211392650 | 211392718 | M.Kdn  |
| chr1 | 204750000 | 215150000 | ENSRNOT00000052494 | NA              | 211392650 | 211392718 | M.Hrt  |
| chr1 | 204750000 | 215150000 | ENSRNOT00000053552 | NA              | 211393150 | 211393275 | M.Tst  |
| chr1 | 204750000 | 215150000 | Nxf1               | Transcription   | 211428457 | 211441798 | M.Tst  |
| chr1 | 204750000 | 215150000 | Nxf1               | Transcription   | 211428457 | 211441798 | M.Kdn  |
| chr1 | 204750000 | 215150000 | Tmem223            | NA              | 211441885 | 211443098 | M.Tst  |
| chr1 | 204750000 | 215150000 | Tmem223            | NA              | 211441885 | 211443098 | M.Kdn  |
| chr1 | 204750000 | 215150000 | Ints5              | Miscellaneous   | 211568313 | 211573094 | M.Prst |
| chr1 | 204750000 | 215150000 | Ganab              | Metabolism      | 211573302 | 211594011 | M.Prst |
| chr1 | 204750000 | 215150000 | Eef1g              | Translation     | 211640225 | 211651560 | M.Kdn  |
| chr1 | 204750000 | 215150000 | LOC100362601       | NA              | 212228789 | 212232842 | M.Tst  |
| chr1 | 204750000 | 215150000 | Rab3il1            | Signaling       | 212463114 | 212482280 | M.Liv  |
| chr1 | 204750000 | 215150000 | Cpsf7              | Translation     | 213009572 | 213032629 | M.Tst  |
| chr1 | 204750000 | 215150000 | Cpsf7              | Translation     | 213009572 | 213032629 | M.Kdn  |
| chr1 | 204750000 | 215150000 | ENSRNOT00000053169 | NA              | 213047106 | 213047223 | M.Kdn  |
| chr1 | 204750000 | 215150000 | ENSRNOT00000053169 | NA              | 213047106 | 213047223 | M.Hrt  |
| chr1 | 204750000 | 215150000 | Ddb1               | DNA repair      | 213095356 | 213120520 | M.Prst |
| chr1 | 204750000 | 215150000 | Vps37c             | Proteolysis     | 213202291 | 213208896 | M.Prst |
| chr1 | 204750000 | 215150000 | Slc15a3            | Transport       | 213341322 | 213356103 | M.SV   |
| chr1 | 204750000 | 215150000 | Tmem109            | Miscellaneous   | 213368573 | 213379148 | M.Liv  |
| chr1 | 204750000 | 215150000 | Ms4a11             | NA              | 214045392 | 214057578 | M.SV   |
| chr1 | 204750000 | 215150000 | Ms4a11             | NA              | 214045392 | 214057578 | M.Prst |
| chr1 | 204750000 | 215150000 | Ms4a11             | NA              | 214045392 | 214057578 | M.Liv  |
| chr1 | 204750000 | 215150000 | Ms4a6a             | Receptor        | 214162552 | 214176200 | M.Prst |
| chr1 | 204750000 | 215150000 | Ms4a6b             | Receptors       | 214208053 | 214219878 | M.SV   |
| chr1 | 204750000 | 215150000 | ENSRNOT00000069284 | NA              | 214655070 | 214655193 | M.Tst  |
| chr1 | 204750000 | 215150000 | LOC100363176       | NA              | 214863977 | 214869264 | M.Tst  |
| chr2 | 180150000 | 183600000 | RGD1303130         | Development     | 180438070 | 180441660 | M.Prst |
| chr2 | 180150000 | 183600000 | Slc25a44           | Binding Protein | 180514428 | 180526461 | M.Prst |
| chr2 | 180150000 | 183600000 | Sema4a             | Signaling       | 180552405 | 180573625 | M.Prst |
| chr2 | 180150000 | 183600000 | Lmna               | Cytoskeleton    | 180595722 | 180616354 | M.Kdn  |
| chr2 | 180150000 | 183600000 | Dap3               | Translation     | 180987261 | 181014360 | M.SV   |
| chr2 | 180150000 | 183600000 | Krtcap2            | Cytoskeleton    | 181417465 | 181421069 | M.SV   |
| chr2 | 180150000 | 183600000 | Lenep              | Cytoskeleton    | 181598076 | 181607196 | M.Prst |
| chr2 | 180150000 | 183600000 | RGD1561797         | NA              | 181612977 | 181616186 | M.Tst  |
| chr2 | 180150000 | 183600000 | Pygo2              | Epigenetics     | 181633028 | 181633349 | M.Prst |
| chr2 | 180150000 | 183600000 | Il6ra              | Receptor        | 182078051 | 182128147 | M.Liv  |
| chr2 | 180150000 | 183600000 | LOC685152          | Transport       | 182166741 | 182166885 | M.Hrt  |
| chr2 | 180150000 | 183600000 | RGD1564171         | Miscellaneous   | 182287947 | 182290740 | M.SV   |
| chr2 | 180150000 | 183600000 | Rps27              | Translation     | 182451530 | 182452619 | M.Tst  |
| chr2 | 180150000 | 183600000 | Dennd4b            | Signaling       | 182507256 | 182522690 | M.Kdn  |
| chr2 | 180150000 | 183600000 | Ints3              | Miscellaneous   | 182650173 | 182702440 | M.Tst  |
| chr2 | 180150000 | 183600000 | Ints3              | Miscellaneous   | 182650173 | 182702440 | M.Prst |
| chr2 | 180150000 | 183600000 | S100a6             | Signaling       | 182895080 | 182896305 | M.Tst  |
| chr2 | 180150000 | 183600000 | S100a6             | Signaling       | 182895080 | 182896305 | M.Kdn  |
| chr2 | 188650000 | 192550000 | mrpl9              | Translation     | 189417391 | 189422114 | M.Tst  |
| chr2 | 188650000 | 192550000 | LOC100363361       | Transcription   | 189907124 | 189915547 | M.Tst  |
| chr2 | 188650000 | 192550000 | LOC100363361       | Transcription   | 189907124 | 189915547 | M.Prst |
| chr2 | 188650000 | 192550000 | Vps72              | Transcription   | 190012907 | 190024404 | M.Prst |
| chr2 | 188650000 | 192550000 | Lass2              | NA              | 190224045 | 190233351 | M.Tst  |
| chr2 | 188650000 | 192550000 | Setdb1             | Epigenetics     | 190232228 | 190264289 | M.Kdn  |
| chr2 | 188650000 | 192550000 | Ctsk               | Protease        | 190394854 | 190405668 | M.Hrt  |

|      |           |           |                    |                 |           |           |        |
|------|-----------|-----------|--------------------|-----------------|-----------|-----------|--------|
| chr2 | 188650000 | 192550000 | Ctss               | Protease        | 190422634 | 190466877 | M.Liv  |
| chr2 | 188650000 | 192550000 | Tars2              | Metabolism      | 190530782 | 190547829 | M.Prst |
| chr2 | 188650000 | 192550000 | Prpf3              | Translation     | 190617892 | 190642728 | M.Liv  |
| chr2 | 188650000 | 192550000 | LOC690012          | NA              | 190666850 | 190676146 | M.Liv  |
| chr2 | 188650000 | 192550000 | Hist2h3c2          | Epigenetics     | 191043639 | 191044191 | M.Kdn  |
| chr2 | 188650000 | 192550000 | Hist2h3c2          | Epigenetics     | 191053229 | 191053801 | M.Kdn  |
| chr2 | 188650000 | 192550000 | Hist2h2bb          | Epigenetics     | 191082482 | 191089577 | M.SV   |
| chr2 | 188650000 | 192550000 | Fcgr1a             | Immune          | 191095027 | 191103953 | M.Prst |
| chr2 | 188650000 | 192550000 | Fcgr1a             | Immune          | 191095027 | 191103953 | M.Liv  |
| chr2 | 188650000 | 192550000 | Txnip              | Transcription   | 191356954 | 191360761 | M.SV   |
| chr2 | 188650000 | 192550000 | Txnip              | Transcription   | 191356954 | 191360761 | M.Liv  |
| chr2 | 188650000 | 192550000 | Acp6               | Signaling       | 191942045 | 191964330 | M.Prst |
| chr3 | 144750000 | 147750000 | RGD1559743         | NA              | 14651432  | 14651972  | M.Kdn  |
| chr3 | 144750000 | 147750000 | ENSRNOT00000069216 | NA              | 145372837 | 145372929 | M.Hrt  |
| chr3 | 144750000 | 147750000 | Map1lc3a           | Cytoskeleton    | 145754265 | 145760532 | M.Prst |
| chr3 | 144750000 | 147750000 | Ncoa6              | Transcription   | 145886880 | 145930308 | M.Tst  |
| chr3 | 144750000 | 147750000 | ---                | NA              | 145941387 | 145941635 | M.Kdn  |
| chr3 | 144750000 | 147750000 | Trpc4ap            | Development     | 146139484 | 146206622 | M.Prst |
| chr3 | 144750000 | 147750000 | Edem2              | Metabolism      | 146215241 | 146241062 | M.Hrt  |
| chr3 | 144750000 | 147750000 | Ergic3             | Golgi apparatus | 146416480 | 146426322 | M.Tst  |
| chr3 | 144750000 | 147750000 | Ergic3             | Golgi apparatus | 146416480 | 146426322 | M.Prst |
| chr3 | 144750000 | 147750000 | Rbm39              | Translation     | 146554521 | 146587661 | M.Kdn  |
| chr3 | 144750000 | 147750000 | Scand1             | Transcription   | 146710193 | 146710650 | M.Kdn  |
| chr3 | 144750000 | 147750000 | Ndr3               | Transcription   | 147403379 | 147422617 | M.Prst |
| chr4 | 75400000  | 77850000  | FQ223410           | NA              | 75915531  | 75915630  | M.Tst  |
| chr4 | 75400000  | 77850000  | ENSRNOT00000053328 | NA              | 75918789  | 75918898  | M.Tst  |
| chr4 | 75400000  | 77850000  | Pdia4              | Metabolism      | 75929252  | 75948299  | M.SV   |
| chr4 | 75400000  | 77850000  | Zfp212             | Transcription   | 76049107  | 76060970  | M.Prst |
| chr4 | 75400000  | 77850000  | Znf746             | NA              | 76184770  | 76209237  | M.Prst |
| chr4 | 75400000  | 77850000  | Repin1             | Transcription   | 76688429  | 76690141  | M.SV   |
| chr4 | 75400000  | 77850000  | Tmem176a           | Miscellaneous   | 76920036  | 76923598  | M.Kdn  |
| chr4 | 75400000  | 77850000  | Gpnmb              | Cytoskeleton    | 77161352  | 77182963  | M.Liv  |
| chr4 | 75400000  | 77850000  | ---                | NA              | 77390402  | 77390592  | M.Prst |
| chr4 | 75400000  | 77850000  | ---                | NA              | 77390402  | 77390592  | M.Kdn  |
| chr4 | 75400000  | 77850000  | ---                | NA              | 77390402  | 77390592  | M.Hrt  |
| chr4 | 75400000  | 77850000  | Ccdc126            | Metabolism      | 77445717  | 77466089  | M.Hrt  |
| chr5 | 136750000 | 138950000 | Ccdc17             | Transcription   | 136879831 | 136883445 | M.Kdn  |
| chr5 | 136750000 | 138950000 | Mmachc             | Development     | 136995878 | 137001362 | M.Tst  |
| chr5 | 136750000 | 138950000 | Mmachc             | Development     | 136995878 | 137001362 | M.Prst |
| chr5 | 136750000 | 138950000 | Zswim5             | Transcription   | 137177685 | 137295481 | M.Kdn  |
| chr5 | 136750000 | 138950000 | ENSRNOT00000056936 | NA              | 137190345 | 137190655 | M.Tst  |
| chr5 | 136750000 | 138950000 | GENSCAN00000021509 | NA              | 137468957 | 137469035 | M.Kdn  |
| chr5 | 136750000 | 138950000 | ENSRNOT00000052542 | NA              | 137509717 | 137509832 | M.Tst  |
| chr5 | 136750000 | 138950000 | BC105775           | NA              | 137577433 | 137577758 | M.SV   |
| chr5 | 136750000 | 138950000 | Kdm4a              | Epigenetics     | 138603000 | 138667807 | M.Kdn  |
| chr5 | 136750000 | 138950000 | Ptprf              | Signaling       | 138670952 | 138739002 | M.Prst |
| chr5 | 136750000 | 138950000 | RGD1308616         | NA              | 138854045 | 138854211 | M.Prst |
| chr5 | 163750000 | 167450000 | ENSRNOT00000054574 | NA              | 164356525 | 164356629 | M.Kdn  |
| chr5 | 163750000 | 167450000 | LOC691261          | NA              | 164456648 | 164483642 | M.Kdn  |
| chr5 | 163750000 | 167450000 | LOC500584          | NA              | 164504972 | 164515847 | M.Kdn  |
| chr5 | 163750000 | 167450000 | LOC691280          | NA              | 164913570 | 164931588 | M.Tst  |
| chr5 | 163750000 | 167450000 | Mthfr              | Metabolism      | 165112850 | 165126885 | M.Prst |
| chr5 | 163750000 | 167450000 | Rpl35a             | Translation     | 165189350 | 165189682 | M.Tst  |
| chr5 | 163750000 | 167450000 | Mad2l2             | Transcription   | 165218362 | 165222828 | M.Prst |
| chr5 | 163750000 | 167450000 | Fbxo6              | Transcription   | 165222858 | 165226423 | M.Kdn  |
| chr5 | 163750000 | 167450000 | Ubiad1             | Metabolism      | 165516860 | 165526571 | M.Prst |

|      |           |           |                    |                      |           |           |        |
|------|-----------|-----------|--------------------|----------------------|-----------|-----------|--------|
| chr5 | 163750000 | 167450000 | ENSRNOT00000053105 | NA                   | 165705419 | 165705554 | M.Tst  |
| chr5 | 163750000 | 167450000 | Dffa               | Miscellaneous        | 166179130 | 166192029 | M.Prst |
| chr5 | 163750000 | 167450000 | Kif1b              | Cytoskeleton         | 166249002 | 166381782 | M.Prst |
| chr5 | 163750000 | 167450000 | Ube4b              | Protease             | 166407096 | 166508391 | M.Prst |
| chr5 | 163750000 | 167450000 | Clstn1             | Extracellular matrix | 166671079 | 166734905 | M.Prst |
| chr5 | 163750000 | 167450000 | Tmem201            | NA                   | 166810397 | 166830271 | M.Prst |
| chr5 | 163750000 | 167450000 | LOC691431          | NA                   | 166836753 | 166861368 | M.Kdn  |
| chr5 | 163750000 | 167450000 | Spsb1              | Proteolysis          | 167012678 | 167025639 | M.Kdn  |
| chr5 | 163750000 | 167450000 | Gpr157             | Receptor             | 167197510 | 167223745 | M.Prst |
| chr6 | 132300000 | 136300000 | LOC690965          | NA                   | 132572639 | 132641171 | M.Prst |
| chr6 | 132300000 | 136300000 | Slc25a29           | Binding Protein      | 133166812 | 133177600 | M.Prst |
| chr6 | 132300000 | 136300000 | Wars               | Metabolism           | 133200866 | 133232048 | M.Prst |
| chr6 | 132300000 | 136300000 | rno-mir-341        | NA                   | 134203518 | 134203613 | M.Kdn  |
| chr6 | 132300000 | 136300000 | ENSRNOT00000053070 | NA                   | 134244770 | 134244850 | M.Prst |
| chr6 | 132300000 | 136300000 | FQ213989           | NA                   | 134252751 | 134252836 | M.Prst |
| chr6 | 132300000 | 136300000 | FQ213989           | NA                   | 134254537 | 134254622 | M.Prst |
| chr6 | 132300000 | 136300000 | ENSRNOT00000054133 | NA                   | 134256322 | 134256416 | M.Prst |
| chr6 | 132300000 | 136300000 | AB014881           | NA                   | 134258110 | 134258200 | M.Prst |
| chr6 | 132300000 | 136300000 | ENSRNOT00000053832 | NA                   | 134259001 | 134259092 | M.Prst |
| chr6 | 132300000 | 136300000 | AB014881           | NA                   | 134260788 | 134260882 | M.Prst |
| chr6 | 132300000 | 136300000 | AB014881           | NA                   | 134263473 | 134263557 | M.Prst |
| chr6 | 132300000 | 136300000 | AB014879           | NA                   | 134265258 | 134265338 | M.Prst |
| chr6 | 132300000 | 136300000 | AB014879           | NA                   | 134269705 | 134269791 | M.Prst |
| chr6 | 132300000 | 136300000 | AB014879           | NA                   | 134270805 | 134270885 | M.Prst |
| chr6 | 132300000 | 136300000 | AB014878           | NA                   | 134271691 | 134271778 | M.Prst |
| chr6 | 132300000 | 136300000 | AB014879           | NA                   | 134272581 | 134272670 | M.Prst |
| chr6 | 132300000 | 136300000 | AB014879           | NA                   | 134273476 | 134273556 | M.Prst |
| chr6 | 132300000 | 136300000 | AB014878           | NA                   | 134274363 | 134274453 | M.Prst |
| chr6 | 132300000 | 136300000 | AB014879           | NA                   | 134275256 | 134275342 | M.Prst |
| chr6 | 132300000 | 136300000 | AB014879           | NA                   | 134276149 | 134276229 | M.Prst |
| chr6 | 132300000 | 136300000 | AB014877           | NA                   | 134278112 | 134278199 | M.Prst |
| chr6 | 132300000 | 136300000 | AB014879           | NA                   | 134279897 | 134279977 | M.Prst |
| chr6 | 132300000 | 136300000 | AB014881           | NA                   | 134280783 | 134280871 | M.Prst |
| chr6 | 132300000 | 136300000 | AB014879           | NA                   | 134281675 | 134281761 | M.Prst |
| chr6 | 132300000 | 136300000 | AB014879           | NA                   | 134282568 | 134282648 | M.Prst |
| chr6 | 132300000 | 136300000 | AB014879           | NA                   | 134286979 | 134287068 | M.Prst |
| chr6 | 132300000 | 136300000 | AB014879           | NA                   | 134287876 | 134287956 | M.Prst |
| chr6 | 132300000 | 136300000 | AB014878           | NA                   | 134288761 | 134288850 | M.Prst |
| chr6 | 132300000 | 136300000 | AB014877           | NA                   | 134290666 | 134290752 | M.Prst |
| chr6 | 132300000 | 136300000 | AB014879           | NA                   | 134291560 | 134291640 | M.Prst |
| chr6 | 132300000 | 136300000 | AB014878           | NA                   | 134292447 | 134292535 | M.Prst |
| chr6 | 132300000 | 136300000 | AB014877           | NA                   | 134293338 | 134293426 | M.Prst |
| chr6 | 132300000 | 136300000 | ENSRNOT00000054021 | NA                   | 134294545 | 134294637 | M.Prst |
| chr6 | 132300000 | 136300000 | AB014879           | NA                   | 134295442 | 134295530 | M.Prst |
| chr6 | 132300000 | 136300000 | AB014879           | NA                   | 134296338 | 134296418 | M.Prst |
| chr6 | 132300000 | 136300000 | ENSRNOT00000054054 | NA                   | 134297224 | 134297310 | M.Prst |
| chr6 | 132300000 | 136300000 | AB014878           | NA                   | 134298116 | 134298203 | M.Prst |
| chr6 | 132300000 | 136300000 | AB014879           | NA                   | 134299010 | 134299090 | M.Prst |
| chr6 | 132300000 | 136300000 | AB014879           | NA                   | 134300789 | 134300869 | M.Prst |
| chr6 | 132300000 | 136300000 | AB014878           | NA                   | 134301675 | 134301762 | M.Prst |
| chr6 | 132300000 | 136300000 | ENSRNOT00000053573 | NA                   | 134302564 | 134302651 | M.Prst |
| chr6 | 132300000 | 136300000 | AB014879           | NA                   | 134303458 | 134303538 | M.Prst |
| chr6 | 132300000 | 136300000 | AB014878           | NA                   | 134304344 | 134304431 | M.Prst |
| chr6 | 132300000 | 136300000 | AB014878           | NA                   | 134305803 | 134305890 | M.Prst |
| chr6 | 132300000 | 136300000 | AB014877           | NA                   | 134306693 | 134306778 | M.Prst |
| chr6 | 132300000 | 136300000 | AB014877           | NA                   | 134307586 | 134307666 | M.Prst |

|      |           |           |                    |                 |           |           |        |
|------|-----------|-----------|--------------------|-----------------|-----------|-----------|--------|
| chr6 | 132300000 | 136300000 | AB014878           | NA              | 134308472 | 134308560 | M.Prst |
| chr6 | 132300000 | 136300000 | AB014879           | NA              | 134309363 | 134309449 | M.Prst |
| chr6 | 132300000 | 136300000 | AB014879           | NA              | 134310258 | 134310338 | M.Prst |
| chr6 | 132300000 | 136300000 | AB014877           | NA              | 134311145 | 134311237 | M.Prst |
| chr6 | 132300000 | 136300000 | AB014879           | NA              | 134313000 | 134313080 | M.Prst |
| chr6 | 132300000 | 136300000 | FQ212998           | NA              | 134313886 | 134313979 | M.Prst |
| chr6 | 132300000 | 136300000 | AB014879           | NA              | 134315681 | 134315761 | M.Prst |
| chr6 | 132300000 | 136300000 | AB014879           | NA              | 134317544 | 134317624 | M.Prst |
| chr6 | 132300000 | 136300000 | AB014879           | NA              | 134319325 | 134319405 | M.Prst |
| chr6 | 132300000 | 136300000 | ENSRNOT00000054054 | NA              | 134320214 | 134320300 | M.Prst |
| chr6 | 132300000 | 136300000 | AB014877           | NA              | 134321101 | 134321193 | M.Prst |
| chr6 | 132300000 | 136300000 | AB014879           | NA              | 134321999 | 134322079 | M.Prst |
| chr6 | 132300000 | 136300000 | FQ213989           | NA              | 134322885 | 134322975 | M.Prst |
| chr6 | 132300000 | 136300000 | AB014879           | NA              | 134323783 | 134323863 | M.Prst |
| chr6 | 132300000 | 136300000 | AB014879           | NA              | 134326456 | 134326536 | M.Prst |
| chr6 | 132300000 | 136300000 | Mir667             | NA              | 134400500 | 134400591 | M.Kdn  |
| chr6 | 132300000 | 136300000 | Tecpr2             | Miscellaneous   | 135619756 | 135709735 | M.Prst |
| chr6 | 132300000 | 136300000 | LOC100363014       | NA              | 135783794 | 135858490 | M.Prst |
| chr6 | 137400000 | 139850000 | LOC500726          | NA              | 137707120 | 137730829 | M.Prst |
| chr6 | 137400000 | 139850000 | LOC691616          | NA              | 137890464 | 137892084 | M.SV   |
| chr6 | 137400000 | 139850000 | LOC691616          | NA              | 137890464 | 137892084 | M.Prst |
| chr6 | 137400000 | 139850000 | Jag2               | Receptor        | 137909705 | 137931131 | M.Prst |
| chr6 | 137400000 | 139850000 | Nudt14             | Metabolism      | 137935991 | 137942943 | M.Tst  |
| chr6 | 137400000 | 139850000 | Mta1               | Transcription   | 138118468 | 138143983 | M.Prst |
| chr6 | 137400000 | 139850000 | Adam6              | Receptor        | 138855420 | 138890431 | M.Prst |
| chr6 | 137400000 | 139850000 | Ighg               | NA              | 138941043 | 138942176 | M.Prst |
| chr6 | 137400000 | 139850000 | ENSRNOT00000048037 | NA              | 139361659 | 139362149 | M.Prst |
| chr6 | 137400000 | 139850000 | LOC678701          | NA              | 139397563 | 139398544 | M.Prst |
| chr6 | 137400000 | 139850000 | IgG-2a             | NA              | 139764413 | 139765553 | M.Prst |
| chr6 | 137400000 | 139850000 | IgG-2a             | NA              | 139773176 | 139773676 | M.Prst |
| chr6 | 137400000 | 139850000 | FQ218314           | NA              | 139813361 | 139814238 | M.Kdn  |
| chr7 | 112300000 | 116400000 | Mbrl               | Signaling       | 11236950  | 11244044  | M.Prst |
| chr7 | 112300000 | 116400000 | Wdr18              | Miscellaneous   | 11253373  | 11261805  | M.Tst  |
| chr7 | 112300000 | 116400000 | RGD1307067         | NA              | 11301479  | 11309971  | M.Kdn  |
| chr7 | 112300000 | 116400000 | Med16              | Transcription   | 11311092  | 11323250  | M.Prst |
| chr7 | 112300000 | 116400000 | RGD1359378         | NA              | 112835301 | 112838479 | M.Kdn  |
| chr7 | 112300000 | 116400000 | Ly6e               | Immune          | 113151828 | 113155521 | M.Liv  |
| chr7 | 112300000 | 116400000 | Ly6c               | Immune          | 113178690 | 113182136 | M.Prst |
| chr7 | 112300000 | 116400000 | Ly6c               | Immune          | 113178690 | 113182136 | M.Liv  |
| chr7 | 112300000 | 116400000 | Gsdmd              | Apoptosis       | 113813191 | 113837009 | M.Kdn  |
| chr7 | 112300000 | 116400000 | Tsta3              | Metabolism      | 113929477 | 113933642 | M.Tst  |
| chr7 | 112300000 | 116400000 | Scrib              | Miscellaneous   | 114077733 | 114100794 | M.SV   |
| chr7 | 112300000 | 116400000 | Scrib              | Miscellaneous   | 114077733 | 114100794 | M.Prst |
| chr7 | 112300000 | 116400000 | Siahbp1            | NA              | 114101189 | 114112125 | M.Prst |
| chr7 | 112300000 | 116400000 | Plec1              | NA              | 114202744 | 114262385 | M.Prst |
| chr7 | 112300000 | 116400000 | Exosc4             | Metabolism      | 114374951 | 114377370 | M.Kdn  |
| chr7 | 112300000 | 116400000 | rCG_59505          | NA              | 114429792 | 114485051 | M.Prst |
| chr7 | 112300000 | 116400000 | ENSRNOT00000056375 | NA              | 114490914 | 114500210 | M.Prst |
| chr7 | 112300000 | 116400000 | Bop1               | Translation     | 114500155 | 114524030 | M.Prst |
| chr7 | 112300000 | 116400000 | Bop1               | Translation     | 114500155 | 114524030 | M.Liv  |
| chr7 | 112300000 | 116400000 | Bop1               | Translation     | 114500155 | 114524030 | M.Kdn  |
| chr7 | 112300000 | 116400000 | Mfsd3              | Metabolism      | 114750871 | 114752873 | M.Kdn  |
| chr7 | 112300000 | 116400000 | RGD1309808         | Metabolism      | 115654704 | 115658693 | M.Prst |
| chr7 | 112300000 | 116400000 | Ncf4               | Metabolism      | 116167650 | 116190387 | M.Prst |
| chr7 | 112300000 | 116400000 | Csf2rb             | Receptor        | 116237279 | 116272439 | M.Liv  |
| chr7 | 112300000 | 116400000 | Tst                | Binding protein | 116346601 | 116355921 | M.Kdn  |

|       |           |           |                    |                      |           |           |        |
|-------|-----------|-----------|--------------------|----------------------|-----------|-----------|--------|
| chr7  | 112300000 | 116400000 | Mpst               | Metabolism           | 116359465 | 116364254 | M.Kdn  |
| chr8  | 45400000  | 49300000  | Oaf                | Development          | 46224861  | 46242832  | M.Kdn  |
| chr8  | 45400000  | 49300000  | Pvr11              | Receptor             | 46739494  | 46798633  | M.Prst |
| chr8  | 45400000  | 49300000  | Rnf26              | Protease             | 47093834  | 47095108  | M.Prst |
| chr8  | 45400000  | 49300000  | Tmem24             | NA                   | 47288755  | 47299021  | M.Prst |
| chr8  | 45400000  | 49300000  | Tmem24             | NA                   | 47288755  | 47299021  | M.Liv  |
| chr8  | 45400000  | 49300000  | Dpagt1             | Metabolism           | 47305087  | 47311488  | M.Prst |
| chr8  | 45400000  | 49300000  | Dpagt1             | Metabolism           | 47305087  | 47311488  | M.Kdn  |
| chr8  | 45400000  | 49300000  | Hmbs               | Metabolism           | 47314235  | 47321604  | M.Tst  |
| chr8  | 45400000  | 49300000  | Vps11              | Transport            | 47324512  | 47339213  | M.Prst |
| chr8  | 45400000  | 49300000  | Hyou1              | Protein binding      | 47346753  | 47358869  | M.SV   |
| chr8  | 45400000  | 49300000  | Hyou1              | Protein binding      | 47346753  | 47358869  | M.Prst |
| chr8  | 45400000  | 49300000  | ---                | NA                   | 47651444  | 47651576  | M.Kdn  |
| chr8  | 45400000  | 49300000  | Atp5l              | Metabolism           | 47869992  | 47876824  | M.Tst  |
| chr8  | 45400000  | 49300000  | Mpzl2              | Extracellular matrix | 47991858  | 48001888  | M.Liv  |
| chr8  | 45400000  | 49300000  | ENSRNOT00000053557 | NA                   | 48018953  | 48019084  | M.Prst |
| chr8  | 112800000 | 115850000 | Slc38a3            | Metabolism           | 112898377 | 112914473 | M.Tst  |
| chr8  | 112800000 | 115850000 | Amigo3             | Cytoskeleton         | 113321258 | 113322784 | M.SV   |
| chr8  | 112800000 | 115850000 | Impdh2             | Metabolism           | 113607025 | 113611615 | M.Kdn  |
| chr8  | 112800000 | 115850000 | lp6k2              | Signaling            | 113836756 | 113861897 | M.Liv  |
| chr8  | 112800000 | 115850000 | Slc26a6            | Metabolism           | 113925291 | 113935357 | M.Prst |
| chr8  | 112800000 | 115850000 | Plxnb1             | Signaling            | 114114234 | 114132960 | M.Liv  |
| chr8  | 112800000 | 115850000 | Spink8             | Protease             | 114190549 | 114202178 | M.Tst  |
| chr8  | 112800000 | 115850000 | Nme6               | Signaling            | 114205318 | 114212486 | M.Tst  |
| chr8  | 112800000 | 115850000 | Map4               | Cytoskeleton         | 114300908 | 114438008 | M.Tst  |
| chr8  | 112800000 | 115850000 | Scap               | Miscellaneous        | 114706464 | 114761344 | M.Prst |
| chr8  | 112800000 | 115850000 | Ptpn23             | Signaling            | 114761478 | 114784605 | M.Prst |
| chr8  | 112800000 | 115850000 | Klhl18             | Cytoskeleton         | 114802806 | 114861134 | M.Kdn  |
| chr8  | 112800000 | 115850000 | Nbeal2             | Signaling            | 115014718 | 115026066 | M.Prst |
| chr8  | 112800000 | 115850000 | Pthr1              | NA                   | 115099659 | 115120499 | M.Liv  |
| chr9  | 72250000  | 75550000  | Aamp               | Development          | 73606380  | 73611351  | M.Prst |
| chr9  | 72250000  | 75550000  | Aamp               | Development          | 73606380  | 73611351  | M.Kdn  |
| chr9  | 72250000  | 75550000  | Pnkd               | Metabolism           | 73611608  | 73695976  | M.Prst |
| chr9  | 72250000  | 75550000  | Slc11a1            | Transport            | 73714692  | 73725523  | M.Prst |
| chr9  | 72250000  | 75550000  | Rqcd1              | Signaling            | 73843388  | 73870449  | M.Prst |
| chr9  | 72250000  | 75550000  | Rqcd1              | Signaling            | 73843388  | 73870449  | M.Hrt  |
| chr9  | 72250000  | 75550000  | Plcd4              | Metabolism           | 73872916  | 73905127  | M.Kdn  |
| chr9  | 72250000  | 75550000  | Stk36              | Signaling            | 73951093  | 73976955  | M.Tst  |
| chr9  | 72250000  | 75550000  | Stk36              | Signaling            | 73951093  | 73976955  | M.Kdn  |
| chr9  | 72250000  | 75550000  | ENSRNOT00000057365 | NA                   | 74207404  | 74213746  | M.Tst  |
| chr9  | 72250000  | 75550000  | Des                | Cytoskeleton         | 74637786  | 74645503  | M.Kdn  |
| chr9  | 72250000  | 75550000  | Stk11ip            | Signaling            | 74799499  | 74813957  | M.Prst |
| chr10 | 38900000  | 41200000  | Irf1               | Transcription        | 39220592  | 39227698  | M.Liv  |
| chr10 | 38900000  | 41200000  | LOC303140          | Metabolism           | 39409212  | 39426730  | M.Kdn  |
| chr10 | 38900000  | 41200000  | P4ha2              | Metabolism           | 39522211  | 39550648  | M.SV   |
| chr10 | 38900000  | 41200000  | P4ha2              | Metabolism           | 39522211  | 39550648  | M.Kdn  |
| chr10 | 38900000  | 41200000  | Cdc42se2           | Development          | 40116093  | 40184995  | M.Prst |
| chr10 | 38900000  | 41200000  | Hint1              | Signaling            | 40265633  | 40275627  | M.Tst  |
| chr10 | 38900000  | 41200000  | Rpl13              | Translation          | 40386057  | 40386798  | M.Kdn  |
| chr10 | 38900000  | 41200000  | Slc36a1            | Metabolism           | 40609213  | 40639096  | M.Prst |
| chr10 | 38900000  | 41200000  | Atox1              | Metabolism           | 40858190  | 40873250  | M.Kdn  |
| chr10 | 38900000  | 41200000  | ENSRNOT00000054033 | NA                   | 40892323  | 40892463  | M.Prst |
| chr10 | 54750000  | 58150000  | Slc25a35           | Binding protein      | 55716718  | 55731778  | M.Tst  |
| chr10 | 54750000  | 58150000  | Per1               | Transcription        | 55858223  | 55869279  | M.Liv  |
| chr10 | 54750000  | 58150000  | Per1               | Transcription        | 55858223  | 55869279  | M.Kdn  |
| chr10 | 54750000  | 58150000  | Per1               | Transcription        | 55858223  | 55869279  | M.Hrt  |



|       |           |           |                    |                 |          |          |        |
|-------|-----------|-----------|--------------------|-----------------|----------|----------|--------|
| chr10 | 54750000  | 58150000  | Tmem88             | Miscellaneous   | 56191755 | 56192722 | M.Kdn  |
| chr10 | 54750000  | 58150000  | Fxr2               | Development     | 56450028 | 56470419 | M.Prst |
| chr10 | 54750000  | 58150000  | Cd68               | Immune          | 56481701 | 56483580 | M.SV   |
| chr10 | 54750000  | 58150000  | Tmem102            | Miscellaneous   | 56624958 | 56636020 | M.Prst |
| chr10 | 54750000  | 58150000  | Plscr3             | Binding protein | 56687086 | 56691601 | M.SV   |
| chr10 | 54750000  | 58150000  | Tnk1               | Signaling       | 56692319 | 56701295 | M.Prst |
| chr10 | 54750000  | 58150000  | Pelp1              | Transcription   | 57220322 | 57237359 | M.Tst  |
| chr10 | 54750000  | 58150000  | Pelp1              | Transcription   | 57220322 | 57237359 | M.Prst |
| chr10 | 54750000  | 58150000  | Pfn1               | Cytoskeleton    | 57531658 | 57534366 | M.Kdn  |
| chr10 | 54750000  | 58150000  | Rpain              | Cytoskeleton    | 57874557 | 57881654 | M.SV   |
| chr10 | 62450000  | 64800000  | Dph1               | Miscellaneous   | 62486391 | 62492466 | M.Prst |
| chr10 | 62450000  | 64800000  | ENSRNOT00000041305 | NA              | 62672302 | 62672591 | M.Kdn  |
| chr10 | 62450000  | 64800000  | Prpf8              | Translation     | 62808102 | 62830938 | M.Tst  |
| chr10 | 62450000  | 64800000  | Slc43a2            | Metabolism      | 62853990 | 62892164 | M.Tst  |
| chr10 | 62450000  | 64800000  | Pitpna             | Metabolism      | 62908505 | 62948857 | M.Prst |
| chr10 | 62450000  | 64800000  | Vps53              | Proteolysis     | 63411061 | 63535551 | M.Prst |
| chr10 | 62450000  | 64800000  | Dbil5              | Signaling       | 63571301 | 63572315 | M.Tst  |
| chr10 | 62450000  | 64800000  | Pigs               | Metabolism      | 64292136 | 64307281 | M.Prst |
| chr10 | 62450000  | 64800000  | ENSRNOT00000054438 | NA              | 64334683 | 64334778 | M.Kdn  |
| chr10 | 62450000  | 64800000  | Rab34              | Signaling       | 64443111 | 64447076 | M.SV   |
| chr10 | 62450000  | 64800000  | RGD1566149         | NA              | 64481184 | 64482790 | M.Tst  |
| chr10 | 62450000  | 64800000  | Tmem97             | Miscellaneous   | 64652641 | 64661724 | M.Hrt  |
| chr10 | 86550000  | 91600000  | BC099108           | NA              | 86851151 | 86851437 | M.Tst  |
| chr10 | 86550000  | 91600000  | Fbxl20             | Transcription   | 86856617 | 86912521 | M.Prst |
| chr10 | 86550000  | 91600000  | Zpbp2              | Development     | 87370697 | 87379602 | M.SV   |
| chr10 | 86550000  | 91600000  | Zpbp2              | Development     | 87370697 | 87379602 | M.Liv  |
| chr10 | 86550000  | 91600000  | Rpl35a             | Translation     | 87510023 | 87510441 | M.Tst  |
| chr10 | 86550000  | 91600000  | Nr1d1              | Transcription   | 87541260 | 87548186 | M.SV   |
| chr10 | 86550000  | 91600000  | Rara               | Signaling       | 87731006 | 87753265 | M.Liv  |
| chr10 | 86550000  | 91600000  | Ccr7               | Receptor        | 87924285 | 87936325 | M.Kdn  |
| chr10 | 86550000  | 91600000  | Krt40              | Cytoskeleton    | 88497766 | 88498065 | M.Kdn  |
| chr10 | 86550000  | 91600000  | ENSRNOT00000045189 | NA              | 88504916 | 88505215 | M.Kdn  |
| chr10 | 86550000  | 91600000  | ENSRNOT00000048840 | NA              | 88557017 | 88557409 | M.Kdn  |
| chr10 | 86550000  | 91600000  | ENSRNOT00000048840 | NA              | 88569311 | 88569703 | M.Kdn  |
| chr10 | 86550000  | 91600000  | ENSRNOT00000048840 | NA              | 88575672 | 88576064 | M.Kdn  |
| chr10 | 86550000  | 91600000  | LOC680286          | NA              | 88737031 | 88737753 | M.Kdn  |
| chr10 | 86550000  | 91600000  | Krtap9-1           | NA              | 88794615 | 88804818 | M.Prst |
| chr10 | 86550000  | 91600000  | Eif1               | Translation     | 89255314 | 89257947 | M.SV   |
| chr10 | 86550000  | 91600000  | Eif1               | Translation     | 89255314 | 89257947 | M.Prst |
| chr10 | 86550000  | 91600000  | Jup                | Cytoskeleton    | 89307938 | 89335556 | M.Prst |
| chr10 | 86550000  | 91600000  | Klhl11             | Transcription   | 89407635 | 89417882 | M.Hrt  |
| chr10 | 86550000  | 91600000  | Nkiras2            | Signaling       | 89567507 | 89571663 | M.Prst |
| chr10 | 86550000  | 91600000  | Gcn5l2             | NA              | 89642024 | 89649944 | M.Prst |
| chr10 | 86550000  | 91600000  | Hspb9              | Signaling       | 89651116 | 89651870 | M.Tst  |
| chr10 | 86550000  | 91600000  | Atp6v0a1           | Transport       | 89948286 | 90072304 | M.Prst |
| chr10 | 86550000  | 91600000  | Becn1              | Protease        | 90317953 | 90333329 | M.Prst |
| chr10 | 86550000  | 91600000  | Vat1               | Metabolism      | 90483845 | 90491463 | M.Kdn  |
| chr10 | 86550000  | 91600000  | Rnd2               | Signaling       | 90493477 | 90497050 | M.Tst  |
| chr10 | 86550000  | 91600000  | Arf4l              | NA              | 90700494 | 90702029 | M.Liv  |
| chr10 | 86550000  | 91600000  | Mpp2               | Signaling       | 91126327 | 91153723 | M.Prst |
| chr10 | 86550000  | 91600000  | Nags               | Metabolism      | 91211526 | 91215565 | M.Prst |
| chr10 | 86550000  | 91600000  | RGD1311493         | NA              | 91368941 | 91374644 | M.Prst |
| chr10 | 104150000 | 108000000 | Ubn1               | Transcription   | 10612475 | 10647858 | M.Prst |
| chr10 | 104150000 | 108000000 | N-pac              | NA              | 10648071 | 10683534 | M.Prst |
| chr10 | 104150000 | 108000000 | Anks3              | Transcription   | 10732109 | 10752778 | M.Prst |
| chr10 | 104150000 | 108000000 | Mgrn1              | Protease        | 10756804 | 10805883 | M.Prst |

|       |           |           |                    |                          |           |           |        |
|-------|-----------|-----------|--------------------|--------------------------|-----------|-----------|--------|
| chr10 | 104150000 | 108000000 | LOC363543          | NA                       | 10809552  | 10810469  | M.Kdn  |
| chr10 | 104150000 | 108000000 | Gprc5c             | Signaling                | 104753532 | 104753761 | M.Prst |
| chr10 | 104150000 | 108000000 | RGD1561778         | Immune                   | 105084291 | 105089251 | M.Prst |
| chr10 | 104150000 | 108000000 | RGD1561778         | Immune                   | 105084291 | 105089251 | M.Liv  |
| chr10 | 104150000 | 108000000 | Cd300le            | NA                       | 105102015 | 105111669 | M.Kdn  |
| chr10 | 104150000 | 108000000 | Slc9a3r1           | Development              | 105237637 | 105254750 | M.SV   |
| chr10 | 104150000 | 108000000 | Slc9a3r1           | Development              | 105237637 | 105254750 | M.Prst |
| chr10 | 104150000 | 108000000 | Mrps7              | Translation              | 105683751 | 105686890 | M.Tst  |
| chr10 | 104150000 | 108000000 | Slc25a19           | Binding protein          | 105694526 | 105707452 | M.SV   |
| chr10 | 104150000 | 108000000 | Rps18              | Translation              | 106078133 | 106078669 | M.Tst  |
| chr10 | 104150000 | 108000000 | Itgb4              | Signaling                | 106080448 | 106116634 | M.Prst |
| chr10 | 104150000 | 108000000 | Mrpl38             | Binding protein          | 106238696 | 106245499 | M.Kdn  |
| chr10 | 104150000 | 108000000 | RGD1311078         | NA                       | 106318430 | 106327931 | M.Kdn  |
| chr10 | 104150000 | 108000000 | Ube2o              | Protease                 | 106648350 | 106694554 | M.Prst |
| chr10 | 104150000 | 108000000 | Cygb               | Binding protein          | 106759885 | 106769651 | M.SV   |
| chr10 | 104150000 | 108000000 | RGD1306284         | NA                       | 106948784 | 106953448 | M.Prst |
| chr10 | 104150000 | 108000000 | RGD1307394         | NA                       | 106957786 | 106971951 | M.Prst |
| chr10 | 104150000 | 108000000 | ENSRNOT00000069295 | NA                       | 107176182 | 107176365 | M.Kdn  |
| chr10 | 104150000 | 108000000 | Sec14l1            | Metabolism               | 107220888 | 107267940 | M.Tst  |
| chr10 | 104150000 | 108000000 | Cant1              | Signaling                | 108405355 | 108420225 | M.Prst |
| chr12 | 15650000  | 17750000  | Gpr146             | Receptor                 | 15755504  | 15756505  | M.Kdn  |
| chr12 | 15650000  | 17750000  | Mir339             | NA                       | 15778323  | 15778418  | M.Kdn  |
| chr12 | 15650000  | 17750000  | RGD1311660         | NA                       | 15878193  | 15895538  | M.Kdn  |
| chr12 | 15650000  | 17750000  | Unc84a             | NA                       | 15899097  | 15931964  | M.Prst |
| chr12 | 15650000  | 17750000  | LOC288526          | NA                       | 16818259  | 16822099  | M.Hrt  |
| chr12 | 15650000  | 17750000  | Asmtl              | Epigenetics              | 16823122  | 16825697  | M.Kdn  |
| chr12 | 15650000  | 17750000  | Rpl31              | Translation              | 17453691  | 17454068  | M.Tst  |
| chr12 | 15650000  | 17750000  | Cops6              | Development              | 17598324  | 17606825  | M.Prst |
| chr12 | 15650000  | 17750000  | Taf6               | Transcription            | 17620900  | 17629281  | M.Prst |
| chr12 | 15650000  | 17750000  | Mblac1             | Metabolism and Transport | 17636473  | 17637737  | M.Kdn  |
| chr12 | 21300000  | 24050000  | Polr2j             | Transcription            | 21658728  | 21663906  | M.Tst  |
| chr12 | 21300000  | 24050000  | Por                | Metabolism               | 22078629  | 22154339  | M.Kdn  |
| chr12 | 21300000  | 24050000  | Rhbdd2             | Protease                 | 22198272  | 22208555  | M.Prst |
| chr12 | 21300000  | 24050000  | Rhbdd2             | Protease                 | 22198272  | 22208555  | M.Kdn  |
| chr12 | 21300000  | 24050000  | Bcl7b              | Transcription            | 22652182  | 22656139  | M.SV   |
| chr12 | 21300000  | 24050000  | Dnajc30            | Protein binding          | 22723862  | 22724380  | M.Kdn  |
| chr12 | 21300000  | 24050000  | Abhd11             | Metabolism               | 22777339  | 22780065  | M.Prst |
| chr12 | 21300000  | 24050000  | Wbscr27            | Epigenetic               | 22822307  | 22835028  | M.Kdn  |
| chr12 | 21300000  | 24050000  | Eif4h              | Translation              | 23148332  | 23164980  | M.Prst |
| chr12 | 21300000  | 24050000  | Clip2              | Cytoskeleton             | 23228309  | 23292105  | M.Prst |
| chr12 | 21300000  | 24050000  | ---                | NA                       | 23731909  | 23732126  | M.SV   |
| chr12 | 31750000  | 34300000  | Ubc                | Translation              | 32333187  | 32337949  | M.SV   |
| chr12 | 31750000  | 34300000  | Ubc                | Translation              | 32333187  | 32337949  | M.Prst |
| chr12 | 31750000  | 34300000  | Zfoc1              | NA                       | 32871191  | 32872043  | M.Tst  |
| chr12 | 31750000  | 34300000  | Ccdc92             | Transcription            | 32919640  | 32923724  | M.Hrt  |
| chr12 | 31750000  | 34300000  | Atp6v0a2           | Transport                | 33057196  | 33119921  | M.Prst |
| chr12 | 31750000  | 34300000  | Eif2b1             | Translation              | 33138323  | 33146597  | M.Prst |
| chr12 | 31750000  | 34300000  | Setd8-ps1          | NA                       | 33253255  | 33271667  | M.Prst |
| chr12 | 31750000  | 34300000  | Pitpnm2            | Transport                | 33578103  | 33600689  | M.Prst |
| chr12 | 31750000  | 34300000  | Vps37b             | Proteolysis              | 33684374  | 33713076  | M.Tst  |
| chr12 | 31750000  | 34300000  | Hip1r              | Cytoskeleton             | 33714261  | 33742792  | M.Prst |
| chr12 | 31750000  | 34300000  | Ccdc62             | Transcription            | 33747236  | 33783801  | M.Kdn  |
| chr12 | 41000000  | 44700000  | Gcn111             | Signaling                | 42253353  | 42315249  | M.SV   |
| chr12 | 41000000  | 44700000  | Pxn                | Metabolism               | 42322188  | 42370508  | M.Tst  |
| chr12 | 41000000  | 44700000  | Pxn                | Metabolism               | 42322188  | 42370508  | M.Prst |
| chr12 | 41000000  | 44700000  | Rnf10              | Miscellaneous            | 42609868  | 42643662  | M.Prst |

|       |          |          |                    |                      |          |          |        |
|-------|----------|----------|--------------------|----------------------|----------|----------|--------|
| chr12 | 41000000 | 44700000 | Pop5               | Metabolism           | 42645162 | 42647081 | M.Tst  |
| chr12 | 41000000 | 44700000 | Mlec               | Signaling            | 42729870 | 42740346 | M.Prst |
| chr12 | 41000000 | 44700000 | Acads              | Metabolism           | 42765265 | 42774529 | M.Tst  |
| chr12 | 41000000 | 44700000 | Sspl3              | Protease             | 42788815 | 42873133 | M.Tst  |
| chr12 | 41000000 | 44700000 | Sspl3              | Protease             | 42788815 | 42873133 | M.Prst |
| chr12 | 41000000 | 44700000 | RGD1311899         | Miscellaneous        | 42945683 | 42951259 | M.Kdn  |
| chr12 | 41000000 | 44700000 | Oasl2              | Metabolism           | 42996518 | 43009338 | M.Prst |
| chr12 | 41000000 | 44700000 | Gltp               | Metabolism           | 43193327 | 43215692 | M.Kdn  |
| chr12 | 41000000 | 44700000 | Gltp               | Metabolism           | 43193327 | 43215692 | M.Hrt  |
| chr12 | 41000000 | 44700000 | Acacb              | Metabolism           | 43388679 | 43493013 | M.Prst |
| chr12 | 41000000 | 44700000 | Sart3              | Transcription        | 43893484 | 43920423 | M.Prst |
| chr12 | 41000000 | 44700000 | Ficd               | Signaling            | 43924661 | 43927515 | M.SV   |
| chr12 | 41000000 | 44700000 | Ficd               | Signaling            | 43924661 | 43927515 | M.Liv  |
| chr13 | 85650000 | 89050000 | ---                | NA                   | 85798486 | 85798670 | M.Hrt  |
| chr13 | 85650000 | 89050000 | ENSRNOT00000053447 | NA                   | 86791450 | 86791613 | M.Tst  |
| chr13 | 85650000 | 89050000 | ENSRNOT00000053447 | NA                   | 86791450 | 86791613 | M.Kdn  |
| chr13 | 85650000 | 89050000 | Fcgr2b             | Immune               | 86809005 | 86823601 | M.Prst |
| chr13 | 85650000 | 89050000 | Tomm40b            | Immune               | 87109486 | 87112175 | M.Tst  |
| chr13 | 85650000 | 89050000 | Fcer1g             | Immune               | 87119755 | 87123821 | M.Liv  |
| chr13 | 85650000 | 89050000 | Ppox               | Metabolism           | 87170644 | 87174721 | M.Liv  |
| chr13 | 85650000 | 89050000 | Usp21              | Protease             | 87175893 | 87180031 | M.Tst  |
| chr13 | 85650000 | 89050000 | F11r               | Extracellular matrix | 87369918 | 87393508 | M.Prst |
| chr13 | 85650000 | 89050000 | FQ230857           | NA                   | 87637815 | 87639122 | M.Kdn  |
| chr13 | 85650000 | 89050000 | FQ230857           | NA                   | 87637815 | 87639122 | M.Hrt  |
| chr13 | 85650000 | 89050000 | Cd84               | Immune               | 87830393 | 87859987 | M.Prst |
| chr13 | 85650000 | 89050000 | Pea15a             | Development          | 88187674 | 88197336 | M.Kdn  |
| chr13 | 85650000 | 89050000 | Tagln2             | Cytoskeleton         | 88505258 | 88512178 | M.Liv  |
| chr14 | 36100000 | 40050000 | Agpat9             | Metabolism           | 9998566  | 10050154 | M.SV   |
| chr14 | 36100000 | 40050000 | RGD1310958         | NA                   | 37160631 | 37208711 | M.Kdn  |
| chr14 | 36100000 | 40050000 | ENSRNOT00000002991 | NA                   | 37213283 | 37292691 | M.Liv  |
| chr14 | 36100000 | 40050000 | ENSRNOT00000002991 | NA                   | 37213283 | 37292691 | M.Hrt  |
| chr14 | 36100000 | 40050000 | Ociad1             | Immune               | 37301310 | 37318693 | M.Prst |
| chr14 | 36100000 | 40050000 | RGD1311309         | NA                   | 37453020 | 37594206 | M.Tst  |
| chr14 | 36100000 | 40050000 | Nfxl1              | Transcription        | 38054861 | 38246847 | M.SV   |
| chr14 | 36100000 | 40050000 | Nfxl1              | Transcription        | 38054861 | 38246847 | M.Hrt  |
| chr14 | 36100000 | 40050000 | Nfxl1              | Transcription        | 38067476 | 38067654 | M.SV   |
| chr14 | 36100000 | 40050000 | Nfxl1              | Transcription        | 38067868 | 38068029 | M.SV   |
| chr14 | 36100000 | 40050000 | Nfxl1              | Transcription        | 38067868 | 38068029 | M.Kdn  |
| chr14 | 36100000 | 40050000 | Nfxl1              | Transcription        | 38068126 | 38068226 | M.SV   |
| chr14 | 36100000 | 40050000 | Nfxl1              | Transcription        | 38068776 | 38068890 | M.SV   |
| chr14 | 36100000 | 40050000 | Nfxl1              | Transcription        | 38070038 | 38070162 | M.SV   |
| chr14 | 36100000 | 40050000 | Nfxl1              | Transcription        | 38070806 | 38070928 | M.Kdn  |
| chr14 | 36100000 | 40050000 | Nfxl1              | Transcription        | 38070806 | 38070928 | M.Hrt  |
| chr14 | 36100000 | 40050000 | Nfxl1              | Transcription        | 38074519 | 38074609 | M.SV   |
| chr14 | 36100000 | 40050000 | Nfxl1              | Transcription        | 38074519 | 38074609 | M.Kdn  |
| chr14 | 36100000 | 40050000 | Nfxl1              | Transcription        | 38078341 | 38078461 | M.SV   |
| chr14 | 36100000 | 40050000 | RGD1359201         | NA                   | 38078674 | 38095841 | M.SV   |
| chr14 | 82200000 | 85400000 | Agpat9             | Metabolism           | 9998566  | 10050154 | M.SV   |
| chr14 | 82200000 | 85400000 | Tmem129            | Miscellaneous        | 82761630 | 82777244 | M.Prst |
| chr14 | 82200000 | 85400000 | Maea               | Receptors            | 83124774 | 83158198 | M.Prst |
| chr14 | 82200000 | 85400000 | Ywhah              | Protein binding      | 83448395 | 83457804 | M.Prst |
| chr14 | 82200000 | 85400000 | Depdc5             | Transcription        | 83487582 | 83622303 | M.Tst  |
| chr14 | 82200000 | 85400000 | Depdc5             | Transcription        | 83487582 | 83622303 | M.Liv  |
| chr14 | 82200000 | 85400000 | Atp5e              | NA                   | 83615556 | 83615939 | M.Tst  |
| chr14 | 82200000 | 85400000 | Atp5e              | NA                   | 83615556 | 83615939 | M.Kdn  |
| chr14 | 82200000 | 85400000 | RGD1305469         | NA                   | 83631804 | 83647391 | M.SV   |

|       |          |          |                    |                          |          |          |        |
|-------|----------|----------|--------------------|--------------------------|----------|----------|--------|
| chr14 | 82200000 | 85400000 | RGD1560636         | NA                       | 83742995 | 83808033 | M.SV   |
| chr14 | 82200000 | 85400000 | Selm               | Metabolism               | 84157880 | 84160220 | M.Kdn  |
| chr14 | 82200000 | 85400000 | Dusp18             | Signaling                | 84555975 | 84560365 | M.SV   |
| chr14 | 82200000 | 85400000 | Sf3a1              | Translation              | 84786086 | 84804728 | M.Tst  |
| chr14 | 82200000 | 85400000 | LOC685322          | NA                       | 85353539 | 85353912 | M.Tst  |
| chr15 | 31900000 | 34850000 | Y09171             | NA                       | 32233140 | 32233187 | M.Kdn  |
| chr15 | 31900000 | 34850000 | Lrp10              | Receptor                 | 32527394 | 32533554 | M.Prst |
| chr15 | 31900000 | 34850000 | RGD1565222         | NA                       | 32656916 | 32671931 | M.Prst |
| chr15 | 31900000 | 34850000 | Psmb5              | Protease                 | 32689865 | 32696834 | M.Tst  |
| chr15 | 31900000 | 34850000 | Homez              | Development              | 32948644 | 32965217 | M.Liv  |
| chr15 | 31900000 | 34850000 | Homez              | Development              | 32948644 | 32965217 | M.Hrt  |
| chr15 | 31900000 | 34850000 | Zfhx2              | NA                       | 33175548 | 33175622 | M.Prst |
| chr15 | 31900000 | 34850000 | Thtpa              | Metabolism               | 33201426 | 33205065 | M.Kdn  |
| chr15 | 31900000 | 34850000 | Tinf2              | Transcription            | 33826849 | 33832032 | M.Prst |
| chr15 | 31900000 | 34850000 | Rabggta            | Metabolism               | 33861447 | 33868619 | M.Prst |
| chr15 | 31900000 | 34850000 | Rabggta            | Metabolism               | 33861447 | 33868619 | M.Kdn  |
| chr15 | 31900000 | 34850000 | Dhrs1              | Metabolism               | 33900694 | 33907979 | M.Tst  |
| chr15 | 31900000 | 34850000 | Mcpt2              | Proteolysis              | 34287660 | 34288305 | M.Prst |
| chr15 | 31900000 | 34850000 | Mcpt2              | Proteolysis              | 34287660 | 34288305 | M.Kdn  |
| chr15 | 31900000 | 34850000 | Mcpt1              | Proteolysis              | 34589939 | 34592578 | M.Prst |
| chr16 | 17450000 | 21500000 | Slc35e1            | Metabolism               | 17769201 | 17779363 | M.Prst |
| chr16 | 17450000 | 21500000 | Use1               | Golgi apparatus          | 18528294 | 18530994 | M.Tst  |
| chr16 | 17450000 | 21500000 | Mrpl34             | Translation              | 18636144 | 18636879 | M.Kdn  |
| chr16 | 17450000 | 21500000 | Bst2               | Signaling                | 18698540 | 18701768 | M.Prst |
| chr16 | 17450000 | 21500000 | Pik3r2             | Signaling                | 19171101 | 19179650 | M.Prst |
| chr16 | 17450000 | 21500000 | Ifi30              | Metabolism               | 19181236 | 19185449 | M.Kdn  |
| chr16 | 17450000 | 21500000 | Rab3a              | Signaling                | 19189765 | 19193874 | M.Prst |
| chr16 | 17450000 | 21500000 | Jund               | Transcription            | 19239694 | 19241529 | M.Prst |
| chr16 | 17450000 | 21500000 | Ell                | Transcription            | 19349937 | 19397249 | M.Liv  |
| chr16 | 17450000 | 21500000 | Uba52              | Proteolysis              | 19425409 | 19427555 | M.Hrt  |
| chr16 | 17450000 | 21500000 | Rent1              | NA                       | 19576760 | 19579850 | M.Prst |
| chr16 | 17450000 | 21500000 | Slc25a42           | Binding protein          | 19711607 | 19718584 | M.Tst  |
| chr16 | 17450000 | 21500000 | RGD1308759         | NA                       | 19867130 | 19892848 | M.Prst |
| chr16 | 17450000 | 21500000 | Gatad2a            | Transcription            | 19974633 | 20003490 | M.Prst |
| chr16 | 17450000 | 21500000 | Atp13a1            | Metabolism and Transport | 20100481 | 20117031 | M.Prst |
| chr16 | 17450000 | 21500000 | ENSRNOT00000034446 | NA                       | 20129174 | 20160654 | M.Kdn  |
| chr16 | 17450000 | 21500000 | FQ211569           | NA                       | 20181460 | 20185669 | M.Kdn  |
| chr16 | 17450000 | 21500000 | MGC72612           | NA                       | 20251590 | 20265573 | M.Prst |
| chr16 | 17450000 | 21500000 | MGC72612           | NA                       | 20251590 | 20265573 | M.Kdn  |
| chr16 | 17450000 | 21500000 | ENSRNOT00000051889 | NA                       | 20346052 | 20347290 | M.Tst  |
| chr19 | 23600000 | 26800000 | RGD1564739         | NA                       | 24278128 | 24279626 | M.Hrt  |
| chr19 | 23600000 | 26800000 | Tnp02              | Binding protein          | 24757439 | 24775871 | M.Prst |
| chr19 | 23600000 | 26800000 | Hook2              | Transport                | 24808551 | 24819397 | M.SV   |
| chr19 | 23600000 | 26800000 | Prdx2              | Metabolism               | 24836198 | 24841414 | M.Tst  |
| chr19 | 23600000 | 26800000 | Prdx2              | Metabolism               | 24836198 | 24841414 | M.Kdn  |
| chr19 | 23600000 | 26800000 | Gcdh               | Metabolism and Transport | 24919668 | 24926084 | M.SV   |
| chr19 | 23600000 | 26800000 | Rad23a             | DNA repair               | 24971070 | 24976904 | M.Tst  |
| chr19 | 23600000 | 26800000 | Gadd45gip1         | Epigenetics              | 24977273 | 24979410 | M.Kdn  |
| chr19 | 23600000 | 26800000 | Nfix               | Transcription            | 25018391 | 25111495 | M.Prst |
| chr19 | 23600000 | 26800000 | Mri1               | Translation              | 25591115 | 25597107 | M.Kdn  |
| chr19 | 23600000 | 26800000 | Cd97               | Receptor                 | 26089268 | 26108999 | M.Liv  |
| chr19 | 23600000 | 26800000 | Dnajb1             | Protein binding          | 26213753 | 26217480 | M.Hrt  |
| chr19 | 23600000 | 26800000 | Gpsn2              | NA                       | 26232602 | 26259289 | M.Prst |
| chr19 | 23600000 | 26800000 | RGD1308221         | NA                       | 26572817 | 26672476 | M.Prst |
| chr19 | 34950000 | 37650000 | Tmem208            | Miscellaneous            | 35141501 | 35143925 | M.Tst  |
| chr19 | 34950000 | 37650000 | Pskh1              | Signaling                | 35740175 | 35773790 | M.Prst |

|       |          |          |                    |                 |          |          |        |
|-------|----------|----------|--------------------|-----------------|----------|----------|--------|
| chr19 | 34950000 | 37650000 | Pskh1              | Signaling       | 35740175 | 35773790 | M.Kdn  |
| chr19 | 34950000 | 37650000 | Ddx28              | Transcription   | 35856843 | 35858465 | M.Prst |
| chr19 | 34950000 | 37650000 | Nfatc3             | Transcription   | 35907874 | 35979801 | M.Tst  |
| chr19 | 34950000 | 37650000 | Rps12              | Translation     | 36293808 | 36294342 | M.Kdn  |
| chr19 | 34950000 | 37650000 | Cirh1a             | Development     | 36742206 | 36770285 | M.Tst  |
| chr19 | 34950000 | 37650000 | Sntb2              | Cytoskeleton    | 36781979 | 36866566 | M.Hrt  |
| chr19 | 34950000 | 37650000 | LOC690214          | NA              | 36902778 | 36904111 | M.Kdn  |
| chr19 | 34950000 | 37650000 | Cog8               | Metabolism      | 36904343 | 36914964 | M.Prst |
| chr19 | 34950000 | 37650000 | Nqo1               | Metabolism      | 37251087 | 37266040 | M.Kdn  |
| chr20 | 2000000  | 8050000  | Tubb5              | Cytoskeleton    | 3060237  | 3064785  | M.Kdn  |
| chr20 | 2000000  | 8050000  | Bat1               | NA              | 3611128  | 3623527  | M.Tst  |
| chr20 | 2000000  | 8050000  | ENSRNOT00000052790 | NA              | 3622576  | 3622654  | M.Tst  |
| chr20 | 2000000  | 8050000  | Bat2               | NA              | 3724278  | 3737617  | M.Prst |
| chr20 | 2000000  | 8050000  | ENSRNOT00000052797 | NA              | 3962124  | 3962187  | M.Tst  |
| chr20 | 2000000  | 8050000  | Neu1               | Metabolism      | 3999328  | 4003675  | M.Prst |
| chr20 | 2000000  | 8050000  | Neu1               | Metabolism      | 3999328  | 4003675  | M.Kdn  |
| chr20 | 2000000  | 8050000  | Atf6b              | Transcription   | 4192185  | 4200108  | M.Prst |
| chr20 | 2000000  | 8050000  | Agpat1             | Metabolism      | 4237798  | 4245723  | M.Tst  |
| chr20 | 2000000  | 8050000  | Psmb8              | Protease        | 4786264  | 4789596  | M.Prst |
| chr20 | 2000000  | 8050000  | Hla-dma            | NA              | 4843458  | 4846844  | M.Kdn  |
| chr20 | 2000000  | 8050000  | ENSRNOT00000036804 | NA              | 4909280  | 4917172  | M.Prst |
| chr20 | 2000000  | 8050000  | Rps18              | Translation     | 5083626  | 5087304  | M.Tst  |
| chr20 | 2000000  | 8050000  | Tapbp              | Immune          | 5096644  | 5117749  | M.Kdn  |
| chr20 | 2000000  | 8050000  | Phf1               | Epigenetics     | 5170050  | 5175029  | M.Prst |
| chr20 | 2000000  | 8050000  | Itpr3              | Transport       | 5292430  | 5357502  | M.Prst |
| chr20 | 2000000  | 8050000  | RGD1306917         | NA              | 5358004  | 5371506  | M.Tst  |
| chr20 | 2000000  | 8050000  | Nudt3              | Signaling       | 5789033  | 5841633  | M.Kdn  |
| chr20 | 2000000  | 8050000  | Spdef              | Transcription   | 5928300  | 5934265  | M.SV   |
| chr20 | 2000000  | 8050000  | RGD1307264         | NA              | 6066778  | 6114705  | M.Prst |
| chr20 | 2000000  | 8050000  | Taf11              | Transcription   | 6113417  | 6119513  | M.Hrt  |
| chr20 | 2000000  | 8050000  | Znf76              | NA              | 6417556  | 6446496  | M.Prst |
| chr20 | 2000000  | 8050000  | Mapk13             | Signaling       | 7055313  | 7064405  | M.Prst |
| chr20 | 2000000  | 8050000  | Brpf3              | Transcription   | 7090904  | 7121514  | M.Tst  |
| chr20 | 2000000  | 8050000  | Cdkn1a             | Cell cycle      | 7376325  | 7386778  | M.Prst |
| chr20 | 2000000  | 8050000  | U15425             | NA              | 7657695  | 7658977  | M.Prst |
| chr20 | 2000000  | 8050000  | Tbc1d22b           | Signaling       | 7880190  | 7921453  | M.Prst |
| chr20 | 2000000  | 8050000  | Rnf8               | Proteolysis     | 7929796  | 7954697  | M.Tst  |
| chr20 | 2000000  | 8050000  | Ftsjd2             | NA              | 7957560  | 8014387  | M.Prst |
| chr20 | 2000000  | 8050000  | Tbrg1              | Growth factor   | 30830696 | 30832163 | M.Prst |
| chr20 | 2000000  | 8050000  | Dcbld1             | Development     | 30945776 | 31037959 | M.Prst |
| chr20 | 2000000  | 8050000  | Pln                | Metabolism      | 32000371 | 32008559 | M.Prst |
| chr20 | 2000000  | 8050000  | ---                | NA              | 33057448 | 33058521 | M.Tst  |
| chr20 | 2000000  | 8050000  | LOC100359595       | NA              | 34820149 | 35021979 | M.Kdn  |
| chr20 | 2000000  | 8050000  | GENSCAN00000021698 | NA              | 36088033 | 36089088 | M.Kdn  |
| chr20 | 2000000  | 8050000  | Tspyl4             | Protein binding | 38639281 | 38641288 | M.Liv  |
| chr20 | 2000000  | 8050000  | ENSRNOT00000052893 | NA              | 39307650 | 39307790 | M.Hrt  |
| chr20 | 2000000  | 8050000  | Rpl13a             | Translation     | 41125183 | 41125850 | M.Tst  |
| chr20 | 2000000  | 8050000  | Fyn                | Signaling       | 43501853 | 43695567 | M.Liv  |
| chr20 | 2000000  | 8050000  | Slc16a10           | Transport       | 44211646 | 44325332 | M.Prst |
| chr20 | 2000000  | 8050000  | Bxdc1              | NA              | 44388616 | 44410101 | M.Liv  |
| chr20 | 2000000  | 8050000  | J01884             | NA              | 44425033 | 44425245 | M.Tst  |
| chr20 | 2000000  | 8050000  | Zbtb24             | Transcription   | 45408881 | 45425056 | M.Prst |
| chr20 | 2000000  | 8050000  | Foxo3              | Transcription   | 46171683 | 46261910 | M.Prst |
| chr20 | 2000000  | 8050000  | Sec63              | Protein binding | 46669289 | 46734882 | M.Prst |
| chr20 | 2000000  | 8050000  | Fxc1               | NA              | 47476320 | 47476986 | M.Prst |
| chr20 | 2000000  | 8050000  | Fxc1               | NA              | 47476320 | 47476986 | M.Kdn  |

|       |         |         |         |            |          |          |        |
|-------|---------|---------|---------|------------|----------|----------|--------|
| chr20 | 2000000 | 8050000 | Rtn4ip1 | Metabolism | 47818478 | 47857755 | M.Prst |
| chr20 | 2000000 | 8050000 | Aim1    | NA         | 47862449 | 47919390 | M.Prst |
| chr20 | 2000000 | 8050000 | Aim1    | NA         | 47919270 | 47921443 | M.Prst |
