# Supplementary material for: Genomic Clustering of differential DNA methylated regions (epimutations) associated with the epigenetic transgenerational inheritance of disease and phenotypic variation
Source: PubMed Central journal article supplement (PMC4888261; doi:10.1186/s12864-016-2748-5), 2016-06-01
Supplement: 12864_2016_2748_MOESM3_ESM.pdf [file 12864_2016_2748_MOESM3_ESM.pdf]

**Supplemental Table S2 Female Tissue Gene Clusters**

| Cluster    | Gene         | Gene       | Gene               | Tissue         |           |           |         |
|------------|--------------|------------|--------------------|----------------|-----------|-----------|---------|
| Chromosome | ClusterStart | ClusterEnd | Gene.Name          | Classification | cSTART    | cSTOP     | Type    |
| chr1       | 81050000     | 84100000   | Pex3               |                | 8316113   | 8358052   | Fm.Liv  |
| chr1       | 81050000     | 84100000   | Sdccag1            |                | 82120277  | 82122428  | Fm.Hrt  |
| chr1       | 81050000     | 84100000   | Egln2              |                | 82233239  | 82241258  | Fm.Uter |
| chr1       | 81050000     | 84100000   | Ltbp4              |                | 82385958  | 82418177  | Fm.Uter |
| chr1       | 81050000     | 84100000   | ENSRNOT00000057163 |                | 82734707  | 82736642  | Fm.Ov   |
| chr1       | 81050000     | 84100000   | LOC687333          |                | 83003444  | 83016695  | Fm.Hrt  |
| chr1       | 93900000     | 96700000   | LOC499144          |                | 93986011  | 93992823  | Fm.Liv  |
| chr1       | 93900000     | 96700000   | RGD1309326         |                | 94714136  | 94720015  | Fm.Hrt  |
| chr1       | 93900000     | 96700000   | Tbc1d17            |                | 95313610  | 95321624  | Fm.Kdn  |
| chr1       | 93900000     | 96700000   | Prr12              |                | 95501946  | 95525617  | Fm.Uter |
| chr1       | 93900000     | 96700000   | Snrp70             |                | 95847853  | 95868392  | Fm.Hrt  |
| chr1       | 93900000     | 96700000   | Snrp70             |                | 95847853  | 95868392  | Fm.Kdn  |
| chr1       | 109350000    | 113350000  | ENSRNOT00000053327 |                | 110871873 | 110871950 | Fm.Uter |
| chr1       | 109350000    | 113350000  | ENSRNOT00000053327 |                | 110873709 | 110873786 | Fm.Uter |
| chr1       | 109350000    | 113350000  | ENSRNOT00000053882 |                | 111288045 | 111288137 | Fm.Ov   |
| chr1       | 109350000    | 113350000  | ENSRNOT00000054014 |                | 111338314 | 111338406 | Fm.Ov   |
| chr1       | 109350000    | 113350000  | ENSRNOT00000052564 |                | 111349177 | 111349269 | Fm.Ov   |
| chr1       | 109350000    | 113350000  | ENSRNOT00000053882 |                | 111360802 | 111360894 | Fm.Ov   |
| chr1       | 109350000    | 113350000  | ENSRNOT00000053882 |                | 111371982 | 111372074 | Fm.Ov   |
| chr1       | 109350000    | 113350000  | ENSRNOT00000053882 |                | 111374556 | 111374648 | Fm.Ov   |
| chr1       | 109350000    | 113350000  | ENSRNOT00000053529 |                | 111377258 | 111377350 | Fm.Ov   |
| chr1       | 109350000    | 113350000  | ENSRNOT00000053882 |                | 111386349 | 111386441 | Fm.Ov   |
| chr1       | 109350000    | 113350000  | ENSRNOT00000053882 |                | 111388918 | 111389010 | Fm.Ov   |
| chr1       | 109350000    | 113350000  | ENSRNOT00000053882 |                | 111391497 | 111391589 | Fm.Ov   |
| chr1       | 109350000    | 113350000  | ENSRNOT00000053882 |                | 111399841 | 111399933 | Fm.Ov   |
| chr1       | 109350000    | 113350000  | ENSRNOT00000053893 |                | 111454267 | 111454359 | Fm.Ov   |
| chr1       | 109350000    | 113350000  | ENSRNOT00000053882 |                | 111456841 | 111456933 | Fm.Ov   |
| chr1       | 109350000    | 113350000  | ENSRNOT00000053882 |                | 111467045 | 111467137 | Fm.Ov   |
| chr1       | 159650000    | 163550000  | Hbb                |                | 161578261 | 161579458 | Fm.Ov   |
| chr1       | 159650000    | 163550000  | Hbb                |                | 161578261 | 161579458 | Fm.Uter |
| chr1       | 159650000    | 163550000  | Hbb                |                | 161584858 | 161620198 | Fm.Ov   |
| chr1       | 159650000    | 163550000  | Hbb                |                | 161584858 | 161620198 | Fm.Uter |
| chr1       | 159650000    | 163550000  | MGC72973           |                | 161590658 | 161598127 | Fm.Ov   |
| chr1       | 159650000    | 163550000  | MGC72973           |                | 161590658 | 161598127 | Fm.Uter |
| chr1       | 159650000    | 163550000  | Rrp8               |                | 163477026 | 163481051 | Fm.Ov   |
| chr1       | 185850000    | 188000000  | Ccdc95             |                | 186030833 | 186041424 | Fm.Uter |
| chr1       | 185850000    | 188000000  | Znf688             |                | 186684555 | 186687183 | Fm.Uter |
| chr1       | 185850000    | 188000000  | ENSRNOT00000053325 |                | 186812653 | 186812786 | Fm.Liv  |
| chr1       | 185850000    | 188000000  | Tgfb1i1            |                | 187504568 | 187511512 | Fm.Uter |
| chr1       | 185850000    | 188000000  | Bag3               |                | 187780988 | 187804835 | Fm.Uter |
| chr1       | 206400000    | 210350000  | Drap1              |                | 208067901 | 208070604 | Fm.Ov   |
| chr1       | 206400000    | 210350000  | Ccdc85b            |                | 208099948 | 208100579 | Fm.Uter |
| chr1       | 206400000    | 210350000  | Rela               |                | 208262669 | 208273148 | Fm.Uter |
| chr1       | 206400000    | 210350000  | Mtvr2              |                | 208355217 | 208356772 | Fm.Ov   |
| chr1       | 206400000    | 210350000  | Ltbp3              |                | 208366405 | 208385177 | Fm.Uter |
| chr1       | 206400000    | 210350000  | BC090353           |                | 208428092 | 208428255 | Fm.Hrt  |
| chr1       | 206400000    | 210350000  | Slc25a45           |                | 208513653 | 208519990 | Fm.Liv  |
| chr1       | 206400000    | 210350000  | Mrpl49             |                | 208691822 | 208694923 | Fm.Ov   |
| chr1       | 206400000    | 210350000  | LOC100361915       |                | 208705280 | 208712079 | Fm.Uter |
| chr1       | 206400000    | 210350000  | RGD1560108         |                | 210107906 | 210108290 | Fm.Hrt  |
| chr2       | 188800000    | 192900000  | Lingo4             |                | 189345199 | 189369074 | Fm.Uter |
| chr2       | 188800000    | 192900000  | Oaz3               |                | 189408570 | 189417752 | Fm.Ov   |
| chr2       | 188800000    | 192900000  | LOC100363361       |                | 189907124 | 189915547 | Fm.Kdn  |

|      |           |           |                    |           |           |         |
|------|-----------|-----------|--------------------|-----------|-----------|---------|
| chr2 | 188800000 | 192900000 | Car14              | 190683387 | 190690466 | Fm.Ov   |
| chr2 | 188800000 | 192900000 | Plekho1            | 190787503 | 190796057 | Fm.Uter |
| chr2 | 188800000 | 192900000 | Sf3b4              | 190976645 | 190981640 | Fm.Uter |
| chr2 | 188800000 | 192900000 | Sv2a               | 190985435 | 191000859 | Fm.Kdn  |
| chr2 | 188800000 | 192900000 | Rbm8               | 191429809 | 191432185 | Fm.Uter |
| chr2 | 188800000 | 192900000 | Gpr89              | 191676215 | 191700484 | Fm.Hrt  |
| chr2 | 188800000 | 192900000 | FQ217306           | 192534080 | 192534354 | Fm.Kdn  |
| chr3 | 7200000   | 9800000   | ENSRNOT00000052447 | 7826086   | 7826248   | Fm.Ov   |
| chr3 | 7200000   | 9800000   | Setx               | 8099542   | 8156463   | Fm.Hrt  |
| chr3 | 7200000   | 9800000   | Setx               | 8099542   | 8156463   | Fm.Uter |
| chr3 | 7200000   | 9800000   | Odf2               | 8877009   | 8921175   | Fm.Ov   |
| chr3 | 7200000   | 9800000   | LOC499770          | 9187007   | 9194243   | Fm.Kdn  |
| chr3 | 7200000   | 9800000   | Cry2               | 76802782  | 76830902  | Fm.Uter |
| chr3 | 7200000   | 9800000   | Hsd17b12           | 78436634  | 78559724  | Fm.Uter |
| chr3 | 7200000   | 9800000   | Ttc17              | 78706151  | 78815348  | Fm.Hrt  |
| chr3 | 7200000   | 9800000   | ENSRNOT00000056863 | 88325556  | 88433892  | Fm.Liv  |
| chr3 | 7200000   | 9800000   | ENSRNOT00000056831 | 89733136  | 89815718  | Fm.Uter |
| chr3 | 7200000   | 9800000   | Lin7c              | 95327942  | 95335254  | Fm.Ov   |
| chr3 | 107400000 | 111200000 | Ndufb4             | 108822485 | 108823579 | Fm.Ov   |
| chr3 | 107400000 | 111200000 | RGD1562529         | 108839136 | 108905119 | Fm.Ov   |
| chr3 | 107400000 | 111200000 | Slc28a2            | 109203979 | 109204805 | Fm.Hrt  |
| chr3 | 107400000 | 111200000 | Slc28a2            | 109203979 | 109204805 | Fm.Liv  |
| chr3 | 107400000 | 111200000 | Slc28a2            | 109350531 | 109372027 | Fm.Hrt  |
| chr3 | 107400000 | 111200000 | Slc28a2            | 109350531 | 109372027 | Fm.Liv  |
| chr3 | 107400000 | 111200000 | MGC105649          | 109610054 | 109613454 | Fm.Ov   |
| chr3 | 112800000 | 116500000 | Ptges2             | 11521725  | 11528396  | Fm.Ov   |
| chr3 | 112800000 | 116500000 | Trpm7              | 114311685 | 114410273 | Fm.Hrt  |
| chr3 | 112800000 | 116500000 | Ap4e1              | 114550196 | 114615095 | Fm.Hrt  |
| chr3 | 112800000 | 116500000 | Ciao1              | 114740676 | 114746203 | Fm.Ov   |
| chr3 | 112800000 | 116500000 | ENSRNOT00000055921 | 114767633 | 114767988 | Fm.Hrt  |
| chr3 | 112800000 | 116500000 | ENSRNOT00000055921 | 114767633 | 114767988 | Fm.Ov   |
| chr3 | 112800000 | 116500000 | Anapc1             | 116214677 | 116297953 | Fm.Uter |
| chr4 | 26200000  | 30000000  | ENSRNOT00000062069 | 2911511   | 2914338   | Fm.Ov   |
| chr4 | 26200000  | 30000000  | Cyp51              | 26752542  | 26771131  | Fm.Hrt  |
| chr4 | 26200000  | 30000000  | Samd9l             | 28016232  | 28016960  | Fm.Kdn  |
| chr4 | 26200000  | 30000000  | Samd9l             | 28086298  | 28087026  | Fm.Kdn  |
| chr4 | 26200000  | 30000000  | RGD1561472         | 28142515  | 28143240  | Fm.Kdn  |
| chr4 | 26200000  | 30000000  | Samd9l             | 28180812  | 28185536  | Fm.Kdn  |
| chr4 | 26200000  | 30000000  | Gng11              | 28847907  | 28853349  | Fm.Ov   |
| chr4 | 26200000  | 30000000  | LOC500034          | 39063882  | 39128085  | Fm.Ov   |
| chr4 | 165300000 | 167300000 | MGC94282           | 165378057 | 165383377 | Fm.Hrt  |
| chr4 | 165300000 | 167300000 | Pzp                | 165505085 | 165551149 | Fm.Uter |
| chr4 | 165300000 | 167300000 | Klrb1c             | 166170376 | 166180934 | Fm.Ov   |
| chr4 | 165300000 | 167300000 | Klri1              | 167017909 | 167056435 | Fm.Ov   |
| chr4 | 165300000 | 167300000 | LOC690045          | 167274060 | 167298114 | Fm.Liv  |
| chr5 | 59900000  | 63150000  | Tpm2               | 59994101  | 60003261  | Fm.Kdn  |
| chr5 | 59900000  | 63150000  | Gba2               | 60045397  | 60057166  | Fm.Hrt  |
| chr5 | 59900000  | 63150000  | Zcchc7             | 61167557  | 61413408  | Fm.Hrt  |
| chr5 | 59900000  | 63150000  | Zcchc7             | 61472581  | 61477933  | Fm.Hrt  |
| chr5 | 59900000  | 63150000  | Exosc3             | 61878632  | 61883826  | Fm.Ov   |
| chr5 | 59900000  | 63150000  | ---                | 62428918  | 62429008  | Fm.Liv  |
| chr5 | 59900000  | 63150000  | Ncbp1              | 62691068  | 62723436  | Fm.Hrt  |
| chr5 | 142100000 | 144700000 | Macf1              | 142659764 | 142986926 | Fm.Hrt  |
| chr5 | 142100000 | 144700000 | LOC100366213       | 142717134 | 142719930 | Fm.Hrt  |
| chr5 | 142100000 | 144700000 | ENSRNOT00000052635 | 142982420 | 142982524 | Fm.Ov   |
| chr5 | 142100000 | 144700000 | Fhl3               | 144026350 | 144033665 | Fm.Uter |
| chr5 | 142100000 | 144700000 | Sf3a3              | 144040061 | 144059692 | Fm.Uter |

|       |           |           |                    |           |           |         |
|-------|-----------|-----------|--------------------|-----------|-----------|---------|
| chr5  | 142100000 | 144700000 | Mtf1               | 144137786 | 144177518 | Fm.Ov   |
| chr5  | 151750000 | 155500000 | Smpdl3b            | 151982240 | 152124168 | Fm.Hrt  |
| chr5  | 151750000 | 155500000 | Sh3bgrl3           | 152877349 | 152878653 | Fm.Liv  |
| chr5  | 151750000 | 155500000 | Tmem57             | 153568577 | 153636412 | Fm.Hrt  |
| chr5  | 151750000 | 155500000 | Tmem57             | 153568577 | 153636412 | Fm.Ov   |
| chr5  | 151750000 | 155500000 | RGD1359529         | 153698998 | 153702612 | Fm.Hrt  |
| chr5  | 151750000 | 155500000 | RGD1359529         | 153698998 | 153702612 | Fm.Kdn  |
| chr5  | 151750000 | 155500000 | LOC689826          | 154164958 | 154166195 | Fm.Uter |
| chr5  | 151750000 | 155500000 | Fusip1             | 154637426 | 154648795 | Fm.Hrt  |
| chr6  | 125350000 | 128050000 | Tc2n               | 125871936 | 125975388 | Fm.Kdn  |
| chr6  | 125350000 | 128050000 | Trip11             | 126119081 | 126188777 | Fm.Ov   |
| chr6  | 125350000 | 128050000 | Atxn3              | 126196043 | 126229844 | Fm.Hrt  |
| chr6  | 125350000 | 128050000 | Cpsf2              | 126248830 | 126272054 | Fm.Ov   |
| chr6  | 125350000 | 128050000 | ENSRNOT00000011530 | 127304349 | 127305516 | Fm.Liv  |
| chr6  | 125350000 | 128050000 | Asb2               | 127609500 | 127645586 | Fm.Ov   |
| chr7  | 48350000  | 51900000  | Nav3               | 48670216  | 48741044  | Fm.Hrt  |
| chr7  | 48350000  | 51900000  | Nav3               | 48861714  | 48861956  | Fm.Hrt  |
| chr7  | 48350000  | 51900000  | ---                | 49931964  | 49932331  | Fm.Ov   |
| chr7  | 48350000  | 51900000  | Zdhhc17            | 49933342  | 49995860  | Fm.Hrt  |
| chr7  | 48350000  | 51900000  | RGD1561474         | 50214458  | 50313065  | Fm.Hrt  |
| chr7  | 48350000  | 51900000  | Bbs10              | 50317899  | 50320409  | Fm.Hrt  |
| chr7  | 48350000  | 51900000  | Phlda1             | 50541012  | 50542775  | Fm.Uter |
| chr7  | 118800000 | 122650000 | Tnrc6b             | 118993677 | 119201749 | Fm.Hrt  |
| chr7  | 118800000 | 122650000 | ENSRNOT00000039879 | 119445434 | 119445806 | Fm.Hrt  |
| chr7  | 118800000 | 122650000 | Cyp2d4v1           | 120741304 | 120752289 | Fm.Uter |
| chr7  | 118800000 | 122650000 | Cyp2d5             | 120760416 | 120764982 | Fm.Hrt  |
| chr7  | 118800000 | 122650000 | Cyp2d5             | 120760416 | 120764982 | Fm.Uter |
| chr7  | 118800000 | 122650000 | Rrp7a              | 121146045 | 121153416 | Fm.Ov   |
| chr7  | 118800000 | 122650000 | Ttll12             | 121600193 | 121621050 | Fm.Ov   |
| chr10 | 13600000  | 17550000  | Axin1              | 15409373  | 15462726  | Fm.Hrt  |
| chr10 | 13600000  | 17550000  | Luc7l              | 15520577  | 15550006  | Fm.Kdn  |
| chr10 | 13600000  | 17550000  | Hba-a2             | 15554909  | 15571773  | Fm.Ov   |
| chr10 | 13600000  | 17550000  | Hba-a2             | 15554909  | 15571773  | Fm.Uter |
| chr10 | 13600000  | 17550000  | LOC287167          | 15558732  | 15559543  | Fm.Kdn  |
| chr10 | 13600000  | 17550000  | Hba-a2             | 15584359  | 15585215  | Fm.Ov   |
| chr10 | 13600000  | 17550000  | Hba-a2             | 15584359  | 15585215  | Fm.Uter |
| chr10 | 13600000  | 17550000  | RGD1310922         | 15667569  | 15671373  | Fm.Ov   |
| chr10 | 55700000  | 58500000  | Zbtb4              | 56579482  | 56602525  | Fm.Uter |
| chr10 | 55700000  | 58500000  | Slc2a4             | 56786705  | 56792254  | Fm.Hrt  |
| chr10 | 55700000  | 58500000  | Rnasek             | 57077240  | 57078994  | Fm.Uter |
| chr10 | 55700000  | 58500000  | Alox15             | 57185939  | 57194401  | Fm.Kdn  |
| chr10 | 55700000  | 58500000  | Zfp3               | 57664745  | 57666280  | Fm.Liv  |
| chr12 | 19650000  | 21650000  | Agfg2              | 19715577  | 19828867  | Fm.Uter |
| chr12 | 19650000  | 21650000  | Mepce              | 19848918  | 19853448  | Fm.Ov   |
| chr12 | 19650000  | 21650000  | Ap1s1              | 20908378  | 20918225  | Fm.Ov   |
| chr12 | 19650000  | 21650000  | Serpine1           | 20931996  | 20942374  | Fm.Uter |
| chr12 | 19650000  | 21650000  | Prkrip1            | 21586197  | 21604474  | Fm.Hrt  |
| chr13 | 85750000  | 89600000  | ---                | 85798486  | 85798670  | Fm.Ov   |
| chr13 | 85750000  | 89600000  | Uap1               | 85953105  | 85987210  | Fm.Ov   |
| chr13 | 85750000  | 89600000  | Pcp4l1             | 87059477  | 87083054  | Fm.Hrt  |
| chr13 | 85750000  | 89600000  | Apoa2              | 87114734  | 87116372  | Fm.Liv  |
| chr13 | 85750000  | 89600000  | Cd48               | 87684509  | 87708091  | Fm.Kdn  |
| chr13 | 85750000  | 89600000  | Atp1a2             | 88258993  | 88283933  | Fm.Kdn  |
| chr13 | 85750000  | 89600000  | Kcnj10             | 88341102  | 88370591  | Fm.Kdn  |
| chr13 | 85750000  | 89600000  | Pigm               | 88377212  | 88380909  | Fm.Ov   |
| chr13 | 85750000  | 89600000  | Slamf9             | 88480220  | 88482958  | Fm.Kdn  |
| chr15 | 3450000   | 7300000   | Spetex-2F          | 4719340   | 4721663   | Fm.Ov   |

|       |          |          |                    |          |          |         |
|-------|----------|----------|--------------------|----------|----------|---------|
| chr15 | 3450000  | 7300000  | Spetex-2A          | 4738084  | 4740379  | Fm.Ov   |
| chr15 | 3450000  | 7300000  | Spetex-2A          | 4982394  | 4985966  | Fm.Ov   |
| chr15 | 3450000  | 7300000  | Spetex-2C          | 5381867  | 5385012  | Fm.Ov   |
| chr15 | 3450000  | 7300000  | Spetex-2A          | 5435691  | 5439580  | Fm.Ov   |
| chr15 | 3450000  | 7300000  | Spetex-2G          | 5494404  | 5598172  | Fm.Ov   |
| chr15 | 3450000  | 7300000  | Spetex-2H          | 5547299  | 5550592  | Fm.Ov   |
| chr15 | 3450000  | 7300000  | Spetex-2D          | 5922760  | 5925028  | Fm.Ov   |
| chr15 | 3450000  | 7300000  | RGD1306353         | 35791554 | 35805587 | Fm.Hrt  |
| chr15 | 3450000  | 7300000  | Zmym2              | 35921575 | 35978241 | Fm.Hrt  |
| chr15 | 3450000  | 7300000  | Gjb2               | 36153526 | 36159490 | Fm.Uter |
| chr15 | 3450000  | 7300000  | Xpo4               | 36615866 | 36702294 | Fm.Uter |
| chr15 | 3450000  | 7300000  | ENSRNOT00000052659 | 38272646 | 38272741 | Fm.Hrt  |
| chr15 | 3450000  | 7300000  | Nupl1              | 39301525 | 39350088 | Fm.Hrt  |
| chr15 | 3450000  | 7300000  | Rnaseh2b           | 41554754 | 41597638 | Fm.Ov   |
| chr15 | 3450000  | 7300000  | Ints6              | 41925924 | 42030867 | Fm.Hrt  |
| chr15 | 3450000  | 7300000  | Zfp395             | 44796164 | 44817523 | Fm.Uter |
| chr15 | 3450000  | 7300000  | P2ry5              | 53875463 | 53877272 | Fm.Kdn  |
| chr15 | 3450000  | 7300000  | Lcp1               | 56034457 | 56091880 | Fm.Kdn  |
| chr16 | 17300000 | 20300000 | Tmem38a            | 17668988 | 17684448 | Fm.Kdn  |
| chr16 | 17300000 | 20300000 | Cnot7              | 18385449 | 18386236 | Fm.Kdn  |
| chr16 | 17300000 | 20300000 | Slc27a1            | 18769909 | 18786990 | Fm.Uter |
| chr16 | 17300000 | 20300000 | Ccdc124            | 19075014 | 19080086 | Fm.Uter |
| chr16 | 17300000 | 20300000 | Pgpep1             | 19276650 | 19285848 | Fm.Liv  |
| chr16 | 17300000 | 20300000 | Ell                | 19349937 | 19397249 | Fm.Uter |
| chr19 | 24550000 | 26950000 | Fam96b             | 262448   | 264118   | Fm.Ov   |
| chr19 | 24550000 | 26950000 | Nfix               | 25018391 | 25111495 | Fm.Uter |
| chr19 | 24550000 | 26950000 | Nacc1              | 25131751 | 25148664 | Fm.Ov   |
| chr19 | 24550000 | 26950000 | Ier2               | 25159276 | 25160800 | Fm.Hrt  |
| chr19 | 24550000 | 26950000 | Zswim4             | 25611348 | 25636716 | Fm.Uter |
| chr19 | 24550000 | 26950000 | Elmod2             | 26506221 | 26520608 | Fm.Hrt  |
| chr20 | 2750000  | 5850000  | Ppp1r10            | 2970680  | 2984397  | Fm.Ov   |
| chr20 | 2750000  | 5850000  | ENSRNOT00000052790 | 3622576  | 3622654  | Fm.Kdn  |
| chr20 | 2750000  | 5850000  | Rpl13-ps1          | 3908012  | 3908634  | Fm.Ov   |
| chr20 | 2750000  | 5850000  | Neu1               | 3999328  | 4003675  | Fm.Uter |
| chr20 | 2750000  | 5850000  | RT1-Bb             | 4730559  | 4737433  | Fm.Kdn  |
| chr20 | 2750000  | 5850000  | Zbtb22             | 5118604  | 5120514  | Fm.Uter |
| chr20 | 2750000  | 5850000  | ENSRNOT00000059561 | 5148911  | 5149490  | Fm.Hrt  |
| chr20 | 2750000  | 5850000  | Csrp2              | 29590539 | 29591118 | Fm.Ov   |
| chr20 | 2750000  | 5850000  | Ddx21              | 29838671 | 29860514 | Fm.Ov   |
| chr20 | 2750000  | 5850000  | Zufsp              | 30096106 | 30126201 | Fm.Ov   |
| chr20 | 2750000  | 5850000  | ---                | 33057448 | 33058521 | Fm.Kdn  |
| chr20 | 2750000  | 5850000  | Ranbp2             | 37272405 | 37322765 | Fm.Hrt  |
| chr20 | 2750000  | 5850000  | RGD1560095         | 38442095 | 38514255 | Fm.Hrt  |
| chr20 | 2750000  | 5850000  | Lama4              | 43078138 | 43260577 | Fm.Ov   |
| chr20 | 2750000  | 5850000  | LOC100188933       | 43266881 | 43268129 | Fm.Ov   |
| chr20 | 2750000  | 5850000  | Fyn                | 43501853 | 43695567 | Fm.Uter |
| chr20 | 2750000  | 5850000  | Traf3ip2           | 43747622 | 43792258 | Fm.Ov   |
| chr20 | 2750000  | 5850000  | Qrs1               | 47679218 | 47818351 | Fm.Uter |
| chr20 | 2750000  | 5850000  | Ascc3              | 54600906 | 54868857 | Fm.Hrt  |
| chrX  | 39000000 | 42250000 | Gnl3l              | 40301229 | 40331804 | Fm.Ov   |
| chrX  | 39000000 | 42250000 | ---                | 40730725 | 40730779 | Fm.Ov   |
| chrX  | 39000000 | 42250000 | RGD1561065         | 40871138 | 40967234 | Fm.Hrt  |
| chrX  | 39000000 | 42250000 | RGD1561065         | 40871138 | 40967234 | Fm.Kdn  |
| chrX  | 39000000 | 42250000 | Smc1a              | 41503393 | 41547830 | Fm.Ov   |
