# Supplementary material for: Genomic Clustering of differential DNA methylated regions (epimutations) associated with the epigenetic transgenerational inheritance of disease and phenotypic variation
Source: PubMed Central journal article supplement (PMC4888261; doi:10.1186/s12864-016-2748-5), 2016-06-01
Supplement: 12864_2016_2748_MOESM4_ESM.pdf [file 12864_2016_2748_MOESM4_ESM.pdf]

Supplemental Table S3

## Sertoli Cell DMR Cluster

| Cluster | Chromosome | ClusterStart | ClusterEnd | DMR min P Value | DMR cSTART | DMR cSTOP |
|---------|------------|--------------|------------|-----------------|------------|-----------|
| chr1    |            | 39150000     | 42350000   | 0.0445397       | 40399144   | 40400567  |
| chr1    |            | 39150000     | 42350000   | 0.0143362       | 41054707   | 41092501  |
| chr1    |            | 39150000     | 42350000   | 0.00472085      | 41097174   | 41104031  |
| chr1    |            | 62450000     | 65850000   | 0.0306023       | 62798103   | 62801085  |
| chr1    |            | 62450000     | 65850000   | 0.00000485      | 63868861   | 63885057  |
| chr1    |            | 62450000     | 65850000   | 0.0400063       | 64400805   | 64401741  |
| chr1    |            | 62450000     | 65850000   | 0.0347312       | 65242090   | 65247202  |
| chr1    |            | 206250000    | 210350000  | 0.014464        | 206708922  | 206714409 |
| chr1    |            | 206250000    | 210350000  | 0.0304948       | 207661537  | 207670801 |
| chr1    |            | 206250000    | 210350000  | 0.00454151      | 208232325  | 208233267 |
| chr1    |            | 206250000    | 210350000  | 0.0138794       | 208428092  | 208428255 |
| chr1    |            | 206250000    | 210350000  | 0.00872725      | 208699058  | 208700411 |
| chr1    |            | 206250000    | 210350000  | 0.0107973       | 209583414  | 209586571 |
| chr2    |            | 188900000    | 191150000  | 0.0495313       | 189240524  | 189242900 |
| chr2    |            | 188900000    | 191150000  | 0.0108908       | 189778476  | 189781169 |
| chr2    |            | 188900000    | 191150000  | 0.0175331       | 190799602  | 190859954 |
| chr3    |            | 3150000      | 7800000    | 0.0452556       | 3435393    | 3436406   |
| chr3    |            | 3150000      | 7800000    | 0.0443675       | 4390427    | 4419424   |
| chr3    |            | 3150000      | 7800000    | 0.0356916       | 5120291    | 5121217   |
| chr3    |            | 3150000      | 7800000    | 0.038426        | 5809368    | 5809449   |
| chr3    |            | 3150000      | 7800000    | 0.0300528       | 5810027    | 5810097   |
| chr3    |            | 3150000      | 7800000    | 0.0369372       | 5817198    | 5830060   |
| chr3    |            | 168850000    | 171000000  | 0.0180214       | 169089412  | 169099834 |
| chr3    |            | 168850000    | 171000000  | 0.0382939       | 169712268  | 169731866 |
| chr3    |            | 168850000    | 171000000  | 0.047346        | 170831286  | 170839091 |
| chr5    |            | 77500000     | 81400000   | 0.0126496       | 79294671   | 79367278  |
| chr5    |            | 77500000     | 81400000   | 0.00674035      | 79442642   | 79461272  |
| chr5    |            | 77500000     | 81400000   | 0.0198293       | 79471099   | 79492969  |
| chr5    |            | 77500000     | 81400000   | 0.0475767       | 80515699   | 80521861  |
| chr5    |            | 134600000    | 138150000  | 0.00596212      | 136205260  | 136234065 |
| chr5    |            | 134600000    | 138150000  | 0.046184        | 136310964  | 136360649 |
| chr5    |            | 134600000    | 138150000  | 0.0184863       | 136497494  | 136566473 |
| chr6    |            | 102050000    | 105600000  | 0.0370008       | 103693040  | 103694836 |
| chr6    |            | 102050000    | 105600000  | 0.0263825       | 103727927  | 103729726 |
| chr6    |            | 102050000    | 105600000  | 0.00289872      | 104036871  | 104041029 |
| chr7    |            | 7950000      | 12350000   | 0.0148612       | 9028891    | 9030536   |
| chr7    |            | 7950000      | 12350000   | 0.0416807       | 9510066    | 9532434   |
| chr7    |            | 7950000      | 12350000   | 0.00651632      | 9936617    | 9939119   |
| chr7    |            | 7950000      | 12350000   | 0.0329345       | 10367357   | 10369607  |
| chr7    |            | 7950000      | 12350000   | 0.0329578       | 10685977   | 10705327  |
| chr7    |            | 7950000      | 12350000   | 0.00827683      | 10976438   | 10991564  |
| chr7    |            | 116000000    | 119850000  | 0.0422961       | 117266784  | 117307172 |
| chr7    |            | 116000000    | 119850000  | 0.0310916       | 117903217  | 117908964 |
| chr7    |            | 116000000    | 119850000  | 0.0277075       | 117934208  | 117969854 |
| chr7    |            | 116000000    | 119850000  | 0.0322455       | 119794976  | 119805104 |
| chr8    |            | 73000000     | 75750000   | 0.0288506       | 73034563   | 73818366  |
| chr8    |            | 73000000     | 75750000   | 0.00973934      | 73836837   | 73876511  |

|       |          |          |            |          |          |
|-------|----------|----------|------------|----------|----------|
| chr8  | 73000000 | 75750000 | 0.00487821 | 74909359 | 74983325 |
| chr8  | 73000000 | 75750000 | 0.00489224 | 75202511 | 75289572 |
| chr9  | 72550000 | 75700000 | 0.0153927  | 73780203 | 73831168 |
| chr9  | 72550000 | 75700000 | 0.00345848 | 73951093 | 73976955 |
| chr9  | 72550000 | 75700000 | 0.0207753  | 74547427 | 74548521 |
| chr10 | 12150000 | 15050000 | 0.0337017  | 13051312 | 13084236 |
| chr10 | 12150000 | 15050000 | 0.0435974  | 13722377 | 13724292 |
| chr10 | 12150000 | 15050000 | 0.0224177  | 14103353 | 14117608 |
| chr10 | 45700000 | 48600000 | 0.03697    | 46614082 | 46662673 |
| chr10 | 45700000 | 48600000 | 0.0427018  | 47649198 | 47654653 |
| chr10 | 45700000 | 48600000 | 0.00156688 | 47665622 | 47673226 |
| chr10 | 53800000 | 59250000 | 0.0480638  | 55339250 | 55349087 |
| chr10 | 53800000 | 59250000 | 0.0332359  | 55680917 | 55686475 |
| chr10 | 53800000 | 59250000 | 0.0480317  | 55768368 | 55788834 |
| chr10 | 53800000 | 59250000 | 0.0424029  | 55825991 | 55827700 |
| chr10 | 53800000 | 59250000 | 0.0106524  | 56208345 | 56369356 |
| chr10 | 53800000 | 59250000 | 0.0281562  | 56485162 | 56485304 |
| chr10 | 53800000 | 59250000 | 0.0347788  | 56760289 | 56765325 |
| chr10 | 53800000 | 59250000 | 0.0428298  | 56780470 | 56786053 |
| chr10 | 53800000 | 59250000 | 0.0219766  | 57293752 | 57295539 |
| chr10 | 53800000 | 59250000 | 0.0168829  | 57370395 | 57372706 |
| chr10 | 53800000 | 59250000 | 0.0103073  | 57874557 | 57881654 |
| chr10 | 88500000 | 92250000 | 0.0413218  | 90137813 | 90144403 |
| chr10 | 88500000 | 92250000 | 0.0169739  | 90306766 | 90307737 |
| chr10 | 88500000 | 92250000 | 0.00843692 | 90469785 | 90473512 |
| chr10 | 88500000 | 92250000 | 0.034524   | 91581206 | 91581393 |
| chr12 | 32400000 | 36300000 | 0.0406032  | 33977383 | 33997328 |
| chr12 | 32400000 | 36300000 | 0.0199966  | 34196347 | 34209636 |
| chr12 | 32400000 | 36300000 | 0.0449493  | 34382419 | 34393577 |
| chr12 | 32400000 | 36300000 | 0.0367817  | 34412943 | 34463189 |
| chr12 | 32400000 | 36300000 | 0.0225058  | 35412463 | 35443838 |
| chr14 | 8150000  | 11050000 | 0.047394   | 9072989  | 9135391  |
| chr14 | 8150000  | 11050000 | 0.0276051  | 10096519 | 10102420 |
| chr14 | 8150000  | 11050000 | 0.0138289  | 10102482 | 10135653 |
| chr14 | 81900000 | 85550000 | 0.00780089 | 82746460 | 82760864 |
| chr14 | 81900000 | 85550000 | 0.0366503  | 83615556 | 83615939 |
| chr14 | 81900000 | 85550000 | 0.0133893  | 83855894 | 83871922 |
| chr14 | 81900000 | 85550000 | 0.0457239  | 85353539 | 85353912 |
| chr16 | 30450000 | 33850000 | 0.0218235  | 31943480 | 31957555 |
| chr16 | 30450000 | 33850000 | 0.00879214 | 32200642 | 32200814 |
| chr16 | 30450000 | 33850000 | 0.0355941  | 32317666 | 32435983 |
| chr17 | 48150000 | 52050000 | 0.00729179 | 48513674 | 48514066 |
| chr17 | 48150000 | 52050000 | 0.0173306  | 48989449 | 48990680 |
| chr17 | 48150000 | 52050000 | 0.0384544  | 50119480 | 50120573 |
| chr17 | 48150000 | 52050000 | 0.0174517  | 50350988 | 50352473 |
| chr17 | 48150000 | 52050000 | 0.0281426  | 50788000 | 50809123 |
| chr19 | 22950000 | 26800000 | 0.0240019  | 24781386 | 24784715 |
| chr19 | 22950000 | 26800000 | 0.0340153  | 24831536 | 24833320 |
| chr19 | 22950000 | 26800000 | 0.0165459  | 24925342 | 24943271 |
| chr19 | 22950000 | 26800000 | 0.0334597  | 25867705 | 25882323 |

|       |          |          |           |          |          |
|-------|----------|----------|-----------|----------|----------|
| chr19 | 38500000 | 42400000 | 0.0143947 | 40412611 | 40412788 |
| chr19 | 38500000 | 42400000 | 0.0345194 | 40472657 | 40472756 |
| chr19 | 38500000 | 42400000 | 0.0392472 | 40490890 | 40491177 |
| chr19 | 38500000 | 42400000 | 0.0225892 | 40504605 | 40504770 |
