# Supplementary material for: Genomic Clustering of differential DNA methylated regions (epimutations) associated with the epigenetic transgenerational inheritance of disease and phenotypic variation
Source: PubMed Central journal article supplement (PMC4888261; doi:10.1186/s12864-016-2748-5), 2016-06-01
Supplement: 12864_2016_2748_MOESM5_ESM.pdf [file 12864_2016_2748_MOESM5_ESM.pdf]

Supplemental Table S4

## Granulosa Cell DMR Cluster

| Cluster | Chromosome | ClusterStart | ClusterEnd | DMR min P Value | DMR cSTART | DMR cSTOP |
|---------|------------|--------------|------------|-----------------|------------|-----------|
| chr1    |            | 78900000     | 82650000   | 0.017           | 79021827   | 79059686  |
| chr1    |            | 78900000     | 82650000   | 0.0258          | 80663791   | 80682480  |
| chr1    |            | 78900000     | 82650000   | 0.0013          | 80837906   | 80866672  |
| chr1    |            | 78900000     | 82650000   | 0.0415          | 80867063   | 80876234  |
| chr1    |            | 78900000     | 82650000   | 0.0023          | 82229581   | 82233249  |
| chr1    |            | 85550000     | 87750000   | 0.0434          | 85771683   | 85773503  |
| chr1    |            | 85550000     | 87750000   | 0.0408          | 85811563   | 85827563  |
| chr1    |            | 85550000     | 87750000   | 0.0134          | 86076279   | 86085681  |
| chr1    |            | 85550000     | 87750000   | 0.0063          | 87421576   | 87547908  |
| chr1    |            | 94200000     | 97250000   | 0.0274          | 95284085   | 95288174  |
| chr1    |            | 94200000     | 97250000   | 0.0415          | 95566712   | 95576151  |
| chr1    |            | 94200000     | 97250000   | 0.0402          | 96038287   | 96055624  |
| chr1    |            | 94200000     | 97250000   | 0.0277          | 96173539   | 96178485  |
| chr1    |            | 161300000    | 164150000  | 0.0291          | 161584858  | 161620198 |
| chr1    |            | 161300000    | 164150000  | 0.0275          | 162173279  | 162184423 |
| chr1    |            | 161300000    | 164150000  | 0.0093          | 163212921  | 163214511 |
| chr1    |            | 161300000    | 164150000  | 0.0179          | 163278970  | 163282815 |
| chr1    |            | 161300000    | 164150000  | 0.0431          | 163319507  | 163327017 |
| chr1    |            | 204850000    | 208800000  | 0.0198          | 205852746  | 205913024 |
| chr1    |            | 204850000    | 208800000  | 0.0256          | 206438325  | 206455477 |
| chr1    |            | 204850000    | 208800000  | 0.0489          | 206460327  | 206471241 |
| chr1    |            | 204850000    | 208800000  | 0.0115          | 206815462  | 206817131 |
| chr1    |            | 204850000    | 208800000  | 0.0326          | 207469265  | 207475013 |
| chr1    |            | 204850000    | 208800000  | 0.0121          | 208489337  | 208509947 |
| chr1    |            | 204850000    | 208800000  | 0.0037          | 208700770  | 208705093 |
| chr1    |            | 210700000    | 213350000  | 0.0276          | 211391510  | 211391584 |
| chr1    |            | 210700000    | 213350000  | 0.0363          | 211392892  | 211392958 |
| chr1    |            | 210700000    | 213350000  | 0.0082          | 212489224  | 212506444 |
| chr1    |            | 210700000    | 213350000  | 0.0074          | 212512692  | 212671238 |
| chr1    |            | 210700000    | 213350000  | 0.0058          | 212670771  | 212685721 |
| chr1    |            | 246800000    | 250050000  | 0.0143          | 247324252  | 247347553 |
| chr1    |            | 246800000    | 250050000  | 0.011           | 248136869  | 248162256 |
| chr1    |            | 246800000    | 250050000  | 0.0326          | 248727385  | 248733112 |
| chr1    |            | 246800000    | 250050000  | 0.05            | 248764890  | 248775194 |
| chr1    |            | 246800000    | 250050000  | 0.045           | 249358105  | 249371165 |
| chr3    |            | 2800000      | 6450000    | 0.0459          | 3571500    | 3577157   |
| chr3    |            | 2800000      | 6450000    | 0.0291          | 4390427    | 4419424   |
| chr3    |            | 2800000      | 6450000    | 0.0485          | 4522915    | 4524733   |
| chr3    |            | 2800000      | 6450000    | 0.0329          | 4760550    | 4769909   |
| chr3    |            | 2800000      | 6450000    | 0.0026          | 4769882    | 4781027   |
| chr3    |            | 2800000      | 6450000    | 0.0403          | 5808396    | 5808470   |
| chr5    |            | 58000000     | 61150000   | 0.0097          | 58166155   | 58168558  |
| chr5    |            | 58000000     | 61150000   | 0.0477          | 59162536   | 59165371  |
| chr5    |            | 58000000     | 61150000   | 0.0397          | 59551937   | 59768901  |
| chr5    |            | 58000000     | 61150000   | 0.0095          | 59972177   | 59972420  |
| chr5    |            | 58000000     | 61150000   | 0.001           | 59994101   | 60003261  |

|       |           |           |        |           |           |
|-------|-----------|-----------|--------|-----------|-----------|
| chr5  | 151350000 | 154850000 | 0.0224 | 152414554 | 152415938 |
| chr5  | 151350000 | 154850000 | 0.0006 | 152877349 | 152878653 |
| chr5  | 151350000 | 154850000 | 0.0184 | 153157638 | 153178179 |
| chr5  | 151350000 | 154850000 | 0.0125 | 153298163 | 153308017 |
| chr5  | 151350000 | 154850000 | 0.0465 | 154637426 | 154648795 |
| chr5  | 170750000 | 174300000 | 0.0042 | 172393234 | 172421726 |
| chr5  | 170750000 | 174300000 | 0.0158 | 172560734 | 172591208 |
| chr5  | 170750000 | 174300000 | 0.0217 | 172684455 | 172685851 |
| chr5  | 170750000 | 174300000 | 0.0082 | 172723907 | 172727994 |
| chr7  | 112700000 | 116000000 | 0.0154 | 114077733 | 114100794 |
| chr7  | 112700000 | 116000000 | 0.0005 | 114264017 | 114277780 |
| chr7  | 112700000 | 116000000 | 0.0483 | 114500155 | 114524030 |
| chr7  | 112700000 | 116000000 | 0.0076 | 114670493 | 114674335 |
| chr10 | 137000000 | 161000000 | 0.0155 | 14131309  | 14134994  |
| chr10 | 137000000 | 161000000 | 0.0432 | 15118871  | 15119001  |
| chr10 | 137000000 | 161000000 | 0.0267 | 15384697  | 15397270  |
| chr10 | 137000000 | 161000000 | 0.0283 | 15653948  | 15666851  |
| chr10 | 322500000 | 360500000 | 0.0098 | 34067718  | 34067784  |
| chr10 | 322500000 | 360500000 | 0.0336 | 34069763  | 34069830  |
| chr10 | 322500000 | 360500000 | 0.0299 | 34132512  | 34140450  |
| chr10 | 322500000 | 360500000 | 0.0083 | 34197630  | 34205252  |
| chr10 | 625000000 | 655500000 | 0.0041 | 63564454  | 63571168  |
| chr10 | 625000000 | 655500000 | 0.0249 | 63818778  | 63906406  |
| chr10 | 625000000 | 655500000 | 0.0125 | 64292136  | 64307281  |
| chr10 | 625000000 | 655500000 | 0.0061 | 64452384  | 64452452  |
| chr10 | 868500000 | 908000000 | 0.042  | 86972428  | 87027794  |
| chr10 | 868500000 | 908000000 | 0.0075 | 87849158  | 87868697  |
| chr10 | 868500000 | 908000000 | 0.0139 | 88749392  | 88766001  |
| chr10 | 868500000 | 908000000 | 0.003  | 88817241  | 88817795  |
| chr10 | 868500000 | 908000000 | 0.046  | 89652342  | 89675785  |
| chr10 | 868500000 | 908000000 | 0.0317 | 89716624  | 89743137  |
| chr10 | 868500000 | 908000000 | 0.0108 | 90483845  | 90491463  |
| chr10 | 103400000 | 107350000 | 0.0377 | 104553284 | 104596044 |
| chr10 | 103400000 | 107350000 | 0.0417 | 105237637 | 105254750 |
| chr10 | 103400000 | 107350000 | 0.0418 | 105342683 | 105351381 |
| chr10 | 103400000 | 107350000 | 0.015  | 105357786 | 105389938 |
| chr10 | 103400000 | 107350000 | 0.0349 | 105424839 | 105445294 |
| chr10 | 103400000 | 107350000 | 0.0039 | 106249534 | 106273060 |
| chr10 | 103400000 | 107350000 | 0.023  | 106280444 | 106304660 |
| chr10 | 103400000 | 107350000 | 0.0382 | 106639912 | 106645579 |
| chr15 | 318000000 | 342500000 | 0.0278 | 32312308  | 32325152  |
| chr15 | 318000000 | 342500000 | 0.017  | 32527394  | 32533554  |
| chr15 | 318000000 | 342500000 | 0.0207 | 32627631  | 32637861  |
| chr15 | 318000000 | 342500000 | 0.05   | 33761485  | 33771148  |
| chr17 | 67000000  | 87000000  | 0.0414 | 6781899   | 6845097   |
| chr17 | 67000000  | 87000000  | 0.0141 | 7969379   | 7972877   |
| chr17 | 67000000  | 87000000  | 0.0328 | 8037982   | 8039776   |
| chr17 | 67000000  | 87000000  | 0.0448 | 8672024   | 8675258   |
| chr20 | 2850000   | 6800000   | 0.027  | 4095745   | 4105509   |

|       |           |           |        |           |           |
|-------|-----------|-----------|--------|-----------|-----------|
| chr20 | 2850000   | 6800000   | 0.03   | 4786264   | 4789596   |
| chr20 | 2850000   | 6800000   | 0.0169 | 4790363   | 4800997   |
| chr20 | 2850000   | 6800000   | 0.0091 | 4829535   | 4836708   |
| chr20 | 2850000   | 6800000   | 0.0117 | 4843458   | 4846844   |
| chr20 | 2850000   | 6800000   | 0.0433 | 4998627   | 5060283   |
| chr20 | 2850000   | 6800000   | 0.0009 | 5089611   | 5097383   |
| chr20 | 11650000  | 15150000  | 0.0309 | 12309334  | 12338494  |
| chr20 | 11650000  | 15150000  | 0.0292 | 13221692  | 13225367  |
| chr20 | 11650000  | 15150000  | 0.0167 | 13591783  | 13594256  |
| chr20 | 11650000  | 15150000  | 0.0332 | 13596710  | 13621456  |
| chr20 | 11650000  | 15150000  | 0.008  | 13599148  | 13603193  |
| chrX  | 132950000 | 136400000 | 0.0496 | 134387285 | 134396762 |
| chrX  | 132950000 | 136400000 | 0.0064 | 134474700 | 134502013 |
| chrX  | 132950000 | 136400000 | 0.0009 | 134537438 | 134573364 |
| chrX  | 132950000 | 136400000 | 0.0082 | 134914058 | 134925182 |
| chrX  | 132950000 | 136400000 | 0.0438 | 134937891 | 134995705 |
