# Supplementary material for: Genomic Clustering of differential DNA methylated regions (epimutations) associated with the epigenetic transgenerational inheritance of disease and phenotypic variation
Source: PubMed Central journal article supplement (PMC4888261; doi:10.1186/s12864-016-2748-5), 2016-06-01
Supplement: 12864_2016_2748_MOESM6_ESM.pdf [file 12864_2016_2748_MOESM6_ESM.pdf]

Supplemental Table S5

## Primordial Germ Cell DMR Clusters

| Cluster Chromosome | ClusterStart | ClusterEnd | DMR min P Value | DMR cSTART | DMR cSTOP |
|--------------------|--------------|------------|-----------------|------------|-----------|
| chr1               | 159050000    | 164750000  | 0.036802        | 160171951  | 160172893 |
| chr1               | 159050000    | 164750000  | 0.00792557      | 160208359  | 160209309 |
| chr1               | 159050000    | 164750000  | 0.0273203       | 160580940  | 160581884 |
| chr1               | 159050000    | 164750000  | 0.0311665       | 160626353  | 160627315 |
| chr1               | 159050000    | 164750000  | 0.0436967       | 161007450  | 161008388 |
| chr1               | 159050000    | 164750000  | 0.0213911       | 161040276  | 161041226 |
| chr1               | 159050000    | 164750000  | 0.0217852       | 161229983  | 161230930 |
| chr1               | 159050000    | 164750000  | 0.0304003       | 161340241  | 161341182 |
| chr1               | 159050000    | 164750000  | 0.00809794      | 161347591  | 161348535 |
| chr1               | 159050000    | 164750000  | 0.0294102       | 161825890  | 161826855 |
| chr1               | 159050000    | 164750000  | 0.0143487       | 162116977  | 162117430 |
| chr1               | 159050000    | 164750000  | 0.00393428      | 162590020  | 162590976 |
| chr1               | 159050000    | 164750000  | 0.0279007       | 162626124  | 162627080 |
| chr1               | 159050000    | 164750000  | 0.0184928       | 162772333  | 162773271 |
| chr1               | 159050000    | 164750000  | 0.0251045       | 162857313  | 162858260 |
| chr1               | 159050000    | 164750000  | 0.0217125       | 163907346  | 163908294 |
| chr1               | 159050000    | 164750000  | 0.0124801       | 164521184  | 164532002 |
| chr1               | 159050000    | 164750000  | 0.00888314      | 164521184  | 164532002 |
| chr1               | 200550000    | 204200000  | 0.0194718       | 201390131  | 201404487 |
| chr1               | 200550000    | 204200000  | 0.0197359       | 202257225  | 202257896 |
| chr1               | 200550000    | 204200000  | 0.0429305       | 202328074  | 202369623 |
| chr1               | 200550000    | 204200000  | 0.00372789      | 202368685  | 202435004 |
| chr1               | 200550000    | 204200000  | 0.000921743     | 202510208  | 202530499 |
| chr1               | 200550000    | 204200000  | 0.0406367       | 202540093  | 202540740 |
| chr3               | 14800000     | 18250000   | 0.0289346       | 15686892   | 15687821  |
| chr3               | 14800000     | 18250000   | 0.030706        | 16279260   | 16280198  |
| chr3               | 14800000     | 18250000   | 0.0187567       | 16592988   | 16593980  |
| chr3               | 14800000     | 18250000   | 0.00454576      | 16610435   | 16611391  |
| chr3               | 14800000     | 18250000   | 0.0150627       | 16788100   | 16789041  |
| chr3               | 14800000     | 18250000   | 0.0304174       | 16846045   | 16847028  |
| chr3               | 70500000     | 74700000   | 0.0289723       | 70936978   | 70970216  |
| chr3               | 70500000     | 74700000   | 0.00634754      | 71196037   | 71196963  |
| chr3               | 70500000     | 74700000   | 0.0449891       | 71371559   | 71372491  |
| chr3               | 70500000     | 74700000   | 0.0219333       | 71731367   | 71732845  |
| chr3               | 70500000     | 74700000   | 0.0444849       | 72473788   | 72474717  |
| chr3               | 70500000     | 74700000   | 0.0239694       | 72530654   | 72532116  |
| chr3               | 70500000     | 74700000   | 0.0481186       | 72746147   | 72747171  |
| chr3               | 70500000     | 74700000   | 0.00800012      | 73509299   | 73510216  |
| chr3               | 70500000     | 74700000   | 0.0169808       | 74436160   | 74437236  |
| chr3               | 70500000     | 74700000   | 0.0349111       | 74533124   | 74534053  |
| chr3               | 70500000     | 74700000   | 0.000574555     | 74542152   | 74543081  |
| chr3               | 96850000     | 99100000   | 0.0215823       | 96999191   | 97000108  |
| chr3               | 96850000     | 99100000   | 0.00165115      | 97151439   | 97152377  |
| chr3               | 96850000     | 99100000   | 0.0226279       | 97734478   | 97735416  |

|       |           |           |             |           |           |
|-------|-----------|-----------|-------------|-----------|-----------|
| chr3  | 96850000  | 99100000  | 0.0383649   | 98330456  | 98475753  |
| chr3  | 96850000  | 99100000  | 0.00522096  | 98476626  | 98813129  |
| chr3  | 96850000  | 99100000  | 0.00534158  | 98868908  | 98871060  |
| chr4  | 68100000  | 71200000  | 0.0328797   | 68183927  | 68491288  |
| chr4  | 68100000  | 71200000  | 0.0135619   | 69130593  | 69133655  |
| chr4  | 68100000  | 71200000  | 0.0255994   | 69273932  | 69274038  |
| chr4  | 68100000  | 71200000  | 0.0368125   | 69273932  | 69274038  |
| chr4  | 68100000  | 71200000  | 0.000785821 | 70052319  | 70081449  |
| chr4  | 68100000  | 71200000  | 0.0089517   | 70215672  | 70216598  |
| chr4  | 68100000  | 71200000  | 0.0334207   | 70272395  | 70273333  |
| chr4  | 68100000  | 71200000  | 0.013404    | 71072318  | 71077823  |
| chr5  | 137300000 | 141200000 | 0.0113062   | 138425829 | 138426662 |
| chr5  | 137300000 | 141200000 | 0.042222    | 139153024 | 139153962 |
| chr5  | 137300000 | 141200000 | 0.0438338   | 139263023 | 139264762 |
| chr5  | 137300000 | 141200000 | 0.0399221   | 139263023 | 139264762 |
| chr5  | 137300000 | 141200000 | 0.00807352  | 139277596 | 139298139 |
| chr5  | 137300000 | 141200000 | 0.0100801   | 139347062 | 139348071 |
| chr5  | 137300000 | 141200000 | 0.00332865  | 139380269 | 139381842 |
| chr5  | 137300000 | 141200000 | 0.0150889   | 139428888 | 139436813 |
| chr6  | 137800000 | 141300000 | 0.015595    | 137890464 | 137892084 |
| chr6  | 137800000 | 141300000 | 0.00722435  | 138438824 | 138439239 |
| chr6  | 137800000 | 141300000 | 0.00415868  | 139361659 | 139362149 |
| chr6  | 137800000 | 141300000 | 0.0323883   | 139527553 | 139528065 |
| chr6  | 137800000 | 141300000 | 0.0308233   | 139764413 | 139765553 |
| chr6  | 137800000 | 141300000 | 0.0183117   | 139773176 | 139773676 |
| chr6  | 137800000 | 141300000 | 0.0462539   | 139805361 | 139992607 |
| chr7  | 22150000  | 24500000  | 0.0166337   | 22583395  | 22667014  |
| chr7  | 22150000  | 24500000  | 0.0131091   | 23085569  | 23086894  |
| chr7  | 22150000  | 24500000  | 0.0140976   | 23085569  | 23086894  |
| chr7  | 22150000  | 24500000  | 0.0329937   | 23409480  | 23463877  |
| chr7  | 22150000  | 24500000  | 0.0100341   | 24145578  | 24147420  |
| chr8  | 16200000  | 19200000  | 0.0349496   | 17207231  | 17208169  |
| chr8  | 16200000  | 19200000  | 0.0242392   | 17279596  | 17280525  |
| chr8  | 16200000  | 19200000  | 0.0266768   | 17367760  | 17368694  |
| chr8  | 16200000  | 19200000  | 0.0124856   | 17446743  | 17447681  |
| chr8  | 16200000  | 19200000  | 0.0239299   | 18151985  | 18153084  |
| chr8  | 16200000  | 19200000  | 0.0469366   | 19105018  | 19108061  |
| chr10 | 13150000  | 15600000  | 0.00633833  | 13620435  | 13620551  |
| chr10 | 13150000  | 15600000  | 0.00637096  | 13725912  | 13727278  |
| chr10 | 13150000  | 15600000  | 0.0118524   | 13971093  | 13972962  |
| chr10 | 13150000  | 15600000  | 0.0416435   | 14740991  | 14747069  |
| chr10 | 13150000  | 15600000  | 0.013841    | 15129367  | 15134072  |
| chr10 | 33150000  | 36250000  | 0.0499723   | 34251973  | 34252914  |
| chr10 | 33150000  | 36250000  | 0.029364    | 34279874  | 34280854  |
| chr10 | 33150000  | 36250000  | 0.0173162   | 34740402  | 34741337  |
| chr10 | 33150000  | 36250000  | 0.00607209  | 34832721  | 34833656  |
| chr10 | 33150000  | 36250000  | 0.0488985   | 35139783  | 35140047  |

|       |          |          |            |          |          |
|-------|----------|----------|------------|----------|----------|
| chr10 | 42950000 | 46550000 | 0.0184041  | 44085301 | 44093595 |
| chr10 | 42950000 | 46550000 | 0.0299522  | 44397069 | 44398016 |
| chr10 | 42950000 | 46550000 | 0.0149771  | 44590716 | 44591633 |
| chr10 | 42950000 | 46550000 | 0.0120616  | 44716641 | 44717561 |
| chr10 | 42950000 | 46550000 | 0.00301    | 44911284 | 44912204 |
| chr10 | 42950000 | 46550000 | 0.0286629  | 44997581 | 44998510 |
| chr10 | 42950000 | 46550000 | 0.0443392  | 46139837 | 46163246 |
| chr10 | 86600000 | 90650000 | 0.0414848  | 86856617 | 86912521 |
| chr10 | 86600000 | 90650000 | 0.0417371  | 88497766 | 88498065 |
| chr10 | 86600000 | 90650000 | 0.0417371  | 88504916 | 88505215 |
| chr10 | 86600000 | 90650000 | 0.0493252  | 88557017 | 88557409 |
| chr10 | 86600000 | 90650000 | 0.0493252  | 88569311 | 88569703 |
| chr10 | 86600000 | 90650000 | 0.0493252  | 88575672 | 88576064 |
| chr10 | 86600000 | 90650000 | 0.0300812  | 88591541 | 88613240 |
| chr10 | 86600000 | 90650000 | 0.00555123 | 88749392 | 88766001 |
| chr10 | 86600000 | 90650000 | 0.0453932  | 88787902 | 88788468 |
| chr10 | 86600000 | 90650000 | 0.0305101  | 88860843 | 88861391 |
| chr10 | 86600000 | 90650000 | 0.0185495  | 89071915 | 89075732 |
| chr10 | 86600000 | 90650000 | 0.00164727 | 90493477 | 90497050 |
| chr15 | 25100000 | 32750000 | 0.00359595 | 26020147 | 26021052 |
| chr15 | 25100000 | 32750000 | 0.00598212 | 26032642 | 26033583 |
| chr15 | 25100000 | 32750000 | 0.0403975  | 26242461 | 26244145 |
| chr15 | 25100000 | 32750000 | 0.0025765  | 26419130 | 26420059 |
| chr15 | 25100000 | 32750000 | 0.0252395  | 27073756 | 27090445 |
| chr15 | 25100000 | 32750000 | 0.00618495 | 28328085 | 28328568 |
| chr15 | 25100000 | 32750000 | 0.0337836  | 28342453 | 28342962 |
| chr15 | 25100000 | 32750000 | 0.0224698  | 28952117 | 28952709 |
| chr15 | 25100000 | 32750000 | 0.0187091  | 29014486 | 29053344 |
| chr15 | 25100000 | 32750000 | 0.0474358  | 29066728 | 29067352 |
| chr15 | 25100000 | 32750000 | 0.0495567  | 29127688 | 29144513 |
| chr15 | 25100000 | 32750000 | 0.0337836  | 29270459 | 29270968 |
| chr15 | 25100000 | 32750000 | 0.0105507  | 29381627 | 29401328 |
| chr15 | 25100000 | 32750000 | 0.0114594  | 29416742 | 29417241 |
| chr15 | 25100000 | 32750000 | 0.00884557 | 29420195 | 29420696 |
| chr15 | 25100000 | 32750000 | 0.0445708  | 29427627 | 29442041 |
| chr15 | 25100000 | 32750000 | 0.00288001 | 29504338 | 29504925 |
| chr15 | 25100000 | 32750000 | 0.00507221 | 29529870 | 29546854 |
| chr15 | 25100000 | 32750000 | 0.0165708  | 29942062 | 29942571 |
| chr15 | 25100000 | 32750000 | 0.00199533 | 29949860 | 29950385 |
| chr15 | 25100000 | 32750000 | 0.0318432  | 30177249 | 30177765 |
| chr15 | 25100000 | 32750000 | 0.0136383  | 30235979 | 30236780 |
| chr15 | 25100000 | 32750000 | 0.0228597  | 30609336 | 30699773 |
| chr15 | 25100000 | 32750000 | 0.015911   | 30806851 | 30807347 |
| chr15 | 25100000 | 32750000 | 0.0199121  | 31124736 | 31125235 |
| chr15 | 25100000 | 32750000 | 0.0410577  | 31142307 | 31142826 |
| chr15 | 25100000 | 32750000 | 0.0185007  | 31179580 | 31180129 |
| chr15 | 25100000 | 32750000 | 0.0299075  | 32334774 | 32336256 |
