# Supplementary material for: Genomic Clustering of differential DNA methylated regions (epimutations) associated with the epigenetic transgenerational inheritance of disease and phenotypic variation
Source: PubMed Central journal article supplement (PMC4888261; doi:10.1186/s12864-016-2748-5), 2016-06-01
Supplement: 12864_2016_2748_MOESM7_ESM.pdf [file 12864_2016_2748_MOESM7_ESM.pdf]

Supplemental Table S6

## Sperm DMR Clusters

| Cluster | Chromosome | ClusterStart | ClusterEnd | DMR min P Value | DMR cSTART | DMR cSTOP |
|---------|------------|--------------|------------|-----------------|------------|-----------|
| chr1    |            | 76500000     | 81650000   | 0.00000633      | 76716621   | 76717399  |
| chr1    |            | 76500000     | 81650000   | 3.21E-08        | 77218978   | 77219578  |
| chr1    |            | 76500000     | 81650000   | 6.32E-16        | 77218978   | 77219578  |
| chr1    |            | 76500000     | 81650000   | 0.00000382      | 78344996   | 78345976  |
| chr1    |            | 76500000     | 81650000   | 1.33E-16        | 78450272   | 78451687  |
| chr1    |            | 76500000     | 81650000   | 1.26E-19        | 78450272   | 78451687  |
| chr1    |            | 76500000     | 81650000   | 1.33E-16        | 78450272   | 78451687  |
| chr1    |            | 76500000     | 81650000   | 1.26E-19        | 78450272   | 78451687  |
| chr1    |            | 76500000     | 81650000   | 5.16E-09        | 78450592   | 78451687  |
| chr1    |            | 76500000     | 81650000   | 0.00000028      | 79005645   | 79006565  |
| chr1    |            | 76500000     | 81650000   | 0.0000002       | 79058741   | 79060044  |
| chr1    |            | 76500000     | 81650000   | 0.00000623      | 79680291   | 79680891  |
| chr1    |            | 76500000     | 81650000   | 0.00000426      | 79910185   | 79910863  |
| chr1    |            | 76500000     | 81650000   | 0.00000337      | 79910185   | 79910863  |
| chr1    |            | 76500000     | 81650000   | 0.000000337     | 80274216   | 80275308  |
| chr1    |            | 76500000     | 81650000   | 3.63E-10        | 80557664   | 80558744  |
| chr1    |            | 76500000     | 81650000   | 0.00000801      | 80834920   | 80835615  |
| chr1    |            | 92800000     | 97400000   | 0.000000004     | 93660805   | 93661590  |
| chr1    |            | 92800000     | 97400000   | 0.000000404     | 93734203   | 93734913  |
| chr1    |            | 92800000     | 97400000   | 0.000000113     | 93784998   | 93785998  |
| chr1    |            | 92800000     | 97400000   | 0.00000151      | 93866197   | 93866982  |
| chr1    |            | 92800000     | 97400000   | 0.00000195      | 94792412   | 94793122  |
| chr1    |            | 92800000     | 97400000   | 0.00000195      | 94792412   | 94793122  |
| chr1    |            | 92800000     | 97400000   | 0.00000971      | 94866084   | 94867099  |
| chr1    |            | 92800000     | 97400000   | 0.0000036       | 94866199   | 94867099  |
| chr1    |            | 92800000     | 97400000   | 0.000000019     | 95403348   | 95404143  |
| chr1    |            | 92800000     | 97400000   | 4.09E-08        | 95488479   | 95489374  |
| chr1    |            | 92800000     | 97400000   | 0.00000256      | 95892653   | 95894255  |
| chr1    |            | 92800000     | 97400000   | 0.00000371      | 96038195   | 96038795  |
| chr1    |            | 92800000     | 97400000   | 0.00000793      | 96264926   | 96265526  |
| chr1    |            | 92800000     | 97400000   | 0.00000832      | 96527328   | 96528133  |
| chr1    |            | 250450000    | 253300000  | 0.00000704      | 250472051  | 250472651 |
| chr1    |            | 250450000    | 253300000  | 1.79E-11        | 251260561  | 251261161 |
| chr1    |            | 250450000    | 253300000  | 1.46E-19        | 251356410  | 251357495 |
| chr1    |            | 250450000    | 253300000  | 2.07E-27        | 251356410  | 251357495 |
| chr1    |            | 250450000    | 253300000  | 9.89E-09        | 252412922  | 252413522 |
| chr1    |            | 250450000    | 253300000  | 0.00000209      | 252412922  | 252413522 |
| chr1    |            | 250450000    | 253300000  | 9.89E-09        | 252412922  | 252413522 |
| chr1    |            | 250450000    | 253300000  | 0.00000209      | 252412922  | 252413522 |
| chr1    |            | 250450000    | 253300000  | 0.00000188      | 252646829  | 252647729 |
| chr2    |            | 180500000    | 183550000  | 0.00000155      | 181416132  | 181417032 |

|      |           |           |             |           |           |
|------|-----------|-----------|-------------|-----------|-----------|
| chr2 | 180500000 | 183550000 | 0.000000909 | 181615695 | 181616678 |
| chr2 | 180500000 | 183550000 | 0.000000909 | 181615695 | 181616678 |
| chr2 | 180500000 | 183550000 | 2.42E-10    | 181715756 | 181716441 |
| chr2 | 180500000 | 183550000 | 0.00000111  | 181715841 | 181716441 |
| chr2 | 180500000 | 183550000 | 2.98E-11    | 182460590 | 182461570 |
| chr2 | 180500000 | 183550000 | 1.04E-12    | 182460590 | 182461570 |
| chr4 | 160550000 | 162600000 | 0.00000242  | 160665157 | 160666372 |
| chr4 | 160550000 | 162600000 | 7.46E-09    | 160931316 | 160932317 |
| chr4 | 160550000 | 162600000 | 2.16E-10    | 160931316 | 160932317 |
| chr4 | 160550000 | 162600000 | 0.00000623  | 161285353 | 161286243 |
| chr4 | 160550000 | 162600000 | 1.08E-11    | 162504664 | 162505639 |
| chr4 | 160550000 | 162600000 | 8.81E-09    | 162504664 | 162505639 |
| chr5 | 170750000 | 174650000 | 0.00000557  | 171103703 | 171104382 |
| chr5 | 170750000 | 174650000 | 0.00000696  | 172630371 | 172631649 |
| chr5 | 170750000 | 174650000 | 0.000000118 | 172749107 | 172749987 |
| chr5 | 170750000 | 174650000 | 0.00000133  | 172749107 | 172749787 |
| chr5 | 170750000 | 174650000 | 0.000000118 | 172749107 | 172749987 |
| chr5 | 170750000 | 174650000 | 0.00000133  | 172749107 | 172749787 |
| chr5 | 170750000 | 174650000 | 0.000000601 | 172951361 | 172952061 |
| chr5 | 170750000 | 174650000 | 0.00000376  | 173066362 | 173067163 |
| chr6 | 106850000 | 110750000 | 0.00000107  | 107547373 | 107547973 |
| chr6 | 106850000 | 110750000 | 0.00000418  | 108168967 | 108169567 |
| chr6 | 106850000 | 110750000 | 0.00000479  | 108515786 | 108516671 |
| chr6 | 106850000 | 110750000 | 2.08E-29    | 108814406 | 108815606 |
| chr6 | 106850000 | 110750000 | 2.08E-29    | 108814406 | 108815606 |
| chr6 | 106850000 | 110750000 | 0.00000155  | 108814526 | 108815306 |
| chr6 | 106850000 | 110750000 | 9.14E-25    | 108814526 | 108815606 |
| chr6 | 106850000 | 110750000 | 0.00000155  | 108814526 | 108815306 |
| chr6 | 106850000 | 110750000 | 9.14E-25    | 108814526 | 108815606 |
| chr6 | 106850000 | 110750000 | 0.000000705 | 109793195 | 109793870 |
| chr7 | 150000    | 400000    | 0.00000172  | 2006927   | 2007527   |
| chr7 | 150000    | 400000    | 0.00000172  | 2006927   | 2007527   |
| chr7 | 150000    | 400000    | 0.00000347  | 2104216   | 2104816   |
| chr7 | 150000    | 400000    | 0.00000347  | 2104216   | 2104816   |
| chr7 | 150000    | 400000    | 0.000000386 | 2229865   | 2231454   |
| chr7 | 150000    | 400000    | 0.00000058  | 2230364   | 2231254   |
| chr7 | 150000    | 400000    | 0.00000427  | 21141850  | 21142450  |
| chr7 | 150000    | 400000    | 0.00000342  | 21141850  | 21142570  |
| chr7 | 150000    | 400000    | 0.00000638  | 28112035  | 28112635  |
| chr7 | 150000    | 400000    | 0.000000176 | 31001102  | 31001702  |
| chr7 | 113000000 | 115850000 | 0.0000001   | 11424819  | 11425640  |
| chr7 | 113000000 | 115850000 | 9.99E-12    | 11424819  | 11425640  |
| chr7 | 113000000 | 115850000 | 0.0000001   | 11424819  | 11425640  |
| chr7 | 113000000 | 115850000 | 9.99E-12    | 11424819  | 11425640  |
| chr7 | 113000000 | 115850000 | 8.44E-09    | 11583824  | 11584614  |

|       |           |           |             |           |           |
|-------|-----------|-----------|-------------|-----------|-----------|
| chr7  | 113000000 | 115850000 | 2.72E-10    | 11584014  | 11584614  |
| chr7  | 113000000 | 115850000 | 4.94E-09    | 11584014  | 11584614  |
| chr7  | 113000000 | 115850000 | 1.14E-09    | 114277254 | 114278461 |
| chr7  | 113000000 | 115850000 | 0.00000181  | 114502670 | 114504375 |
| chr7  | 113000000 | 115850000 | 1.89E-13    | 114503595 | 114504375 |
| chr7  | 113000000 | 115850000 | 0.000000763 | 114953948 | 114955044 |
| chr7  | 113000000 | 115850000 | 3.57E-10    | 114953948 | 114955044 |
| chr7  | 126200000 | 129400000 | 0.00000168  | 127442049 | 127442649 |
| chr7  | 126200000 | 129400000 | 8.60E-13    | 127449653 | 127450253 |
| chr7  | 126200000 | 129400000 | 0.00000248  | 127772817 | 127773697 |
| chr7  | 126200000 | 129400000 | 0.000000362 | 127816023 | 127816717 |
| chr7  | 126200000 | 129400000 | 3.72E-18    | 127816023 | 127816717 |
| chr7  | 126200000 | 129400000 | 0.000000209 | 128173824 | 128174714 |
| chr7  | 140800000 | 143150000 | 1.39E-08    | 141214859 | 141215936 |
| chr7  | 140800000 | 143150000 | 3.05E-08    | 141470621 | 141471436 |
| chr7  | 140800000 | 143150000 | 0.000000135 | 142249435 | 142250435 |
| chr7  | 140800000 | 143150000 | 0.00000185  | 142276341 | 142277241 |
| chr7  | 140800000 | 143150000 | 7.51E-08    | 142789367 | 142789967 |
| chr7  | 140800000 | 143150000 | 3.02E-11    | 142790359 | 142790959 |
| chr8  | 60400000  | 62600000  | 0.000000209 | 60673757  | 60674357  |
| chr8  | 60400000  | 62600000  | 3.31E-09    | 60673757  | 60674357  |
| chr8  | 60400000  | 62600000  | 1.87E-09    | 60673757  | 60674357  |
| chr8  | 60400000  | 62600000  | 0.000000189 | 61607737  | 61608550  |
| chr8  | 60400000  | 62600000  | 5.55E-09    | 62361422  | 62362307  |
| chr8  | 60400000  | 62600000  | 1.66E-08    | 62361422  | 62362307  |
| chr10 | 54700000  | 58650000  | 0.00000711  | 55855898  | 55856498  |
| chr10 | 54700000  | 58650000  | 0.00000553  | 56132674  | 56133469  |
| chr10 | 54700000  | 58650000  | 6.92E-10    | 56204571  | 56206172  |
| chr10 | 54700000  | 58650000  | 0.00000616  | 56378095  | 56379587  |
| chr10 | 54700000  | 58650000  | 0.000000329 | 56675163  | 56676245  |
| chr10 | 54700000  | 58650000  | 1.63E-10    | 56678345  | 56679370  |
| chr10 | 54700000  | 58650000  | 0.00000223  | 56678445  | 56679248  |
| chr10 | 54700000  | 58650000  | 5.05E-08    | 56687180  | 56687875  |
| chr10 | 54700000  | 58650000  | 0.00000309  | 56720709  | 56721596  |
| chr10 | 54700000  | 58650000  | 0.00000067  | 57077243  | 57078332  |
| chr10 | 54700000  | 58650000  | 0.00000067  | 57077243  | 57078332  |
| chr10 | 54700000  | 58650000  | 0.000008    | 57548762  | 57549583  |
| chr10 | 54700000  | 58650000  | 4.80E-10    | 57549874  | 57551068  |
| chr10 | 83050000  | 87500000  | 3.78E-08    | 83476529  | 83477129  |
| chr10 | 83050000  | 87500000  | 0.000000267 | 84021838  | 84023150  |
| chr10 | 83050000  | 87500000  | 0.00000337  | 84714200  | 84715211  |
| chr10 | 83050000  | 87500000  | 3.95E-08    | 84714285  | 84715211  |
| chr10 | 83050000  | 87500000  | 0.00000565  | 85016559  | 85017435  |
| chr10 | 83050000  | 87500000  | 2.16E-16    | 85032294  | 85033304  |
| chr10 | 83050000  | 87500000  | 8.25E-17    | 85032294  | 85033194  |

|       |          |          |            |          |          |
|-------|----------|----------|------------|----------|----------|
| chr10 | 83050000 | 87500000 | 3.37E-08   | 85032294 | 85033194 |
| chr10 | 83050000 | 87500000 | 1.09E-08   | 85078411 | 85079388 |
| chr10 | 83050000 | 87500000 | 1.08E-08   | 85586351 | 85587341 |
| chr10 | 83050000 | 87500000 | 3.37E-08   | 85586351 | 85587341 |
| chr10 | 83050000 | 87500000 | 0.00000226 | 86320851 | 86321529 |
| chr10 | 83050000 | 87500000 | 0.00000195 | 86320851 | 86321529 |
| chr10 | 83050000 | 87500000 | 0.00000234 | 86323498 | 86324403 |
| chr10 | 83050000 | 87500000 | 0.00000281 | 86551715 | 86552513 |
| chr11 | 80500000 | 84350000 | 0.00000441 | 82426660 | 82427380 |
| chr11 | 80500000 | 84350000 | 0.00000205 | 82429579 | 82430269 |
| chr11 | 80500000 | 84350000 | 4.28E-08   | 82429579 | 82430269 |
| chr11 | 80500000 | 84350000 | 5.58E-11   | 82470316 | 82471209 |
| chr11 | 80500000 | 84350000 | 0.00000972 | 82470413 | 82471209 |
| chr11 | 80500000 | 84350000 | 2.71E-08   | 82470413 | 82471209 |
| chr11 | 80500000 | 84350000 | 0.00000013 | 82519950 | 82520632 |
| chr12 | 14850000 | 18750000 | 6.01E-17   | 16815952 | 16816847 |
| chr12 | 14850000 | 18750000 | 2.69E-13   | 16815952 | 16816847 |
| chr12 | 14850000 | 18750000 | 0.00000125 | 16824203 | 16825214 |
| chr12 | 14850000 | 18750000 | 0.00000125 | 16824203 | 16825214 |
| chr12 | 14850000 | 18750000 | 0.00000076 | 16824308 | 16825214 |
| chr12 | 14850000 | 18750000 | 0.00000076 | 16824308 | 16825214 |
| chr12 | 14850000 | 18750000 | 0.00000955 | 16829845 | 16831365 |
| chr15 | 25200000 | 28250000 | 3.16E-23   | 26056221 | 26058016 |
| chr15 | 25200000 | 28250000 | 1.29E-10   | 26336470 | 26337157 |
| chr15 | 25200000 | 28250000 | 5.65E-14   | 26337866 | 26338466 |
| chr15 | 25200000 | 28250000 | 2.44E-10   | 26395012 | 26396497 |
| chr15 | 25200000 | 28250000 | 1.92E-12   | 27105574 | 27106174 |
| chr15 | 25200000 | 28250000 | 2.21E-11   | 27184787 | 27185387 |
| chr15 | 25200000 | 28250000 | 1.27E-23   | 27346566 | 27347666 |
| chr15 | 25200000 | 28250000 | 5.23E-20   | 27346660 | 27347666 |
| chr20 | 1000000  | 6200000  | 3.30E-17   | 2776113  | 2776813  |
| chr20 | 1000000  | 6200000  | 0.00000181 | 2776113  | 2776813  |
| chr20 | 1000000  | 6200000  | 1.94E-20   | 2984086  | 2984883  |
| chr20 | 1000000  | 6200000  | 1.94E-20   | 2984086  | 2984883  |
| chr20 | 1000000  | 6200000  | 1.91E-13   | 2984169  | 2984883  |
| chr20 | 1000000  | 6200000  | 1.91E-13   | 2984169  | 2984883  |
| chr20 | 1000000  | 6200000  | 0.00000238 | 2987593  | 2988193  |
| chr20 | 1000000  | 6200000  | 0.00000238 | 2987593  | 2988193  |
| chr20 | 1000000  | 6200000  | 9.48E-15   | 3416588  | 3417188  |
| chr20 | 1000000  | 6200000  | 2.79E-12   | 3416588  | 3417188  |
| chr20 | 1000000  | 6200000  | 7.68E-21   | 3442365  | 3443350  |
| chr20 | 1000000  | 6200000  | 0.00000208 | 3442365  | 3443350  |
| chr20 | 1000000  | 6200000  | 0.00000447 | 3497439  | 3498621  |
| chr20 | 1000000  | 6200000  | 0.00000155 | 3497439  | 3498621  |
| chr20 | 1000000  | 6200000  | 2.07E-30   | 3580516  | 3581116  |

|       |          |          |             |          |          |
|-------|----------|----------|-------------|----------|----------|
| chr20 | 1000000  | 6200000  | 0.00000375  | 3667367  | 3668263  |
| chr20 | 1000000  | 6200000  | 0.00000253  | 4047954  | 4048958  |
| chr20 | 1000000  | 6200000  | 0.00000376  | 4103885  | 4104485  |
| chr20 | 1000000  | 6200000  | 1.90E-12    | 4220107  | 4221198  |
| chr20 | 1000000  | 6200000  | 0.00000158  | 4259416  | 4260219  |
| chr20 | 1000000  | 6200000  | 6.66E-08    | 4789651  | 4790543  |
| chr20 | 1000000  | 6200000  | 6.66E-08    | 4789651  | 4790543  |
| chr20 | 1000000  | 6200000  | 0.000000148 | 5022398  | 5022998  |
| chr20 | 1000000  | 6200000  | 0.00000858  | 5179159  | 5179759  |
| chr20 | 1000000  | 6200000  | 0.0000068   | 6067533  | 6068428  |
| chr20 | 1000000  | 6200000  | 0.00000192  | 28130915 | 28131715 |
| chr20 | 1000000  | 6200000  | 0.0000021   | 29546601 | 29547322 |
| chrUn | 23350000 | 27100000 | 0.00000205  | 25163917 | 25164597 |
| chrUn | 23350000 | 27100000 | 3.17E-14    | 25163917 | 25164597 |
| chrUn | 23350000 | 27100000 | 1.40E-10    | 25163917 | 25164597 |
| chrUn | 23350000 | 27100000 | 3.62E-08    | 25163917 | 25164597 |
| chrUn | 23350000 | 27100000 | 6.03E-10    | 25300105 | 25300805 |
| chrUn | 23350000 | 27100000 | 7.39E-10    | 25300105 | 25300805 |
